# Supplementary material for: Combined Metallomics/Transcriptomics Profiling Reveals a Major Role for Metals in Wound Repair
Source: Front Cell Dev Biol. 2021 Nov 30;9:788596. doi: 10.3389/fcell.2021.788596 (PMC8669724; doi:10.3389/fcell.2021.788596)
Supplement: Supplementary file 8 [file DataSheet1.XLSX]

## Sheet: S1
Table S1. Primer sequences used for qRT-PCR validation of RNA-Seq data and keratinocyte differentiation experiments.
Primer	Forward Sequence	Reverse Sequence
mAcan	GGTCACTGTTACCGCCACTT	CCCCTTCGATAGTCCTGTCA
mAif1	ATGTCCTTGAAGCGAATGCT	GACCAGTTGGCCTCTTGTGT
mAvil	GTGGAGGTGGATCAGCAGTT	GTTGGAGTTGAGCGAGGAAG
mClca1	AAGGTGGCCTACCTCCAAGT	GAGAATAGGCGAGGCTCCTT
mCrnn	AGCTCAGACCCAAGCAGGTA	CCCCTGTGTCTGGATGCTAT
mDlk2	CTGGTGGTGTTTGGGTCTCT	TAACCTGGCACTCCTGATCC
mGapdh*	TGCACCACCAACTGCTTAGC	GGCATGGACTGTGGTCATGAG
mGjb2	ATGCTACGACCACCACTTCC	TACGGACCTTCTGGGTTTTG
mMipep	AATCTACCATGGCCAGCATC	ATACCTGATGTCCAGGGCTG
mMmp13	ATCCTGGCCACCTTCTTCTT	TTTCTCGGAGCCTGTCAACT
mPadi2	GGCCACGTCGATGAGTTTAT	ACAGCGCTGGAAGTACTGGT
mPla2g4d	CCCTCAGCTCTGCCTAATTG	CCCGAGCTCTGCTGTATTTC
mS100a8	CCATGCCCTCTACAAGAATGA	ATCACCATCGCAAGGAACTC
S100a9	AGGACCTGGACACAAACCAG	TTACTTCCCACAGCCTTTGC
mSell	CATCCTGAAGCTGTGGGTCT	AATAAGGGCTTTTGGGCAAT
mYwhaz*	TTCTTGATCCCCAATGCTTC	TTCTTGTCATCACCAGCAGC
mFlg	AGGGCCACTCTGACTTCTCA	GACTTCTCCTCGCTGTGTTC
mIvl	AGGAGTCACCTGAGCCAGAA	CTTTCTGATCCCCTGCCATA
mMmp1	ATCCTGGCCACCTTCTTCTT	TTTCTCGGAGCCTGTCAACT
mPlscr1	TAGCTGCTGTTCCGACATTG	TGCTCCTCGTTTCCAGTTCT
mTNF	GAACTGGCAGAAGAGGCACT	AGGGTCTGGGCCATAGAACT
mTsg1	GTGCTCACGATCAGACCAGA	CAATGCGATCAGAGGACTCA
hFLG	GTGTCCCTCACTGTCCCTGT	CCAGGTACCATTGCAGGAGT
hGAPDH*	TGCACCACCAACTGCTTAGC	GGCATGGACTGTGGTCATGAG
hIVL	CTGCCTCAGCCTTACTGTGA	GGAGGAGGAACAGTCTTGAGG
hMMP1	GGTCTGTGAGGGTCAAGCAG	AGTTCATGAGCTGCAACACG
hPLSCR1	GCTTTCCTGTCCCAAATCAG	CCCTCTGTCCAAAGCTGTTC
hTNF	GTGACAAGCCTGTAGCCCAT	CAGACTCGGCAAAGTCGAGA
hTSG1	CCCAAGAGACTAGCAGTGGC	GCTGCCAGTACACCTTGTCA
hYWHAZ*	ACTTTTGGTACATTGTGGCTTCAA	CCGCCAGGACAAACCAGTAT
*Housekeeping genes. m = mouse. h = human.

## Sheet: S2
Table S2. Metal abundance in murine skin and wounds, measured by ICP-MS (Figure 1)*
Metal	Time Point	Mean Concentration (ug/g tissue)	SEM
Calcium	D0	404.345	85.4764
Calcium	D1	312.148	115.629
Calcium	D3	1062.67	109.301
Calcium	D7	1221.84	238.727
Calcium	D14	61.088	10.0545
Magnesium	D0	214.251	14.1208
Magnesium	D1	89.1993	25.9948
Magnesium	D3	283.143	23.0368
Magnesium	D7	399.398	34.4076
Magnesium	D14	347.098	85.6442
Iron	D0	43.173	5.18427
Iron	D1	36.0519	4.30526
Iron	D3	44.0651	1.96168
Iron	D7	120.254	10.2143
Iron	D14	151.861	31.6053
Zinc	D0	20.2372	1.49669
Zinc	D1	11.9211	0.967677
Zinc	D3	14.1253	0.906374
Zinc	D7	23.307	1.13072
Zinc	D14	25.0325	5.78511
Aluminium	D0	9.08006	2.06511
Aluminium	D1	5.30631	0.758041
Aluminium	D3	6.60907	0.750156
Aluminium	D7	10.0362	0.813744
Aluminium	D14	14.3706	1.88825
Copper	D0	1.62092	0.127562
Copper	D1	1.27287	0.119983
Copper	D3	1.67014	0.101494
Copper	D7	2.69407	0.332195
Copper	D14	1.76816	0.384931
Manganese	D0	0.249176	0.0364583
Manganese	D1	0.0892404	0.0206983
Manganese	D3	0.109609	0.0162709
Manganese	D7	0.465505	0.0572834
Manganese	D14	0.641999	0.149347
Cobalt	D0	0.0180927	0.00148365
Cobalt	D1	0.0146667	0.00182313
Cobalt	D3	0.0194644	0.00171438
Cobalt	D7	0.041036	0.00473487
Cobalt	D14	0.130967	0.0240078
*D0 = normal skin, D1 = day 1 post-wounding. SEM = standard error of the mean.

## Sheet: S3
Table S3. Functional annotation of UniProt Knowledge Base metal genes (Figure 2)*
UniProt Metal	Annotation	Genes	-Log10 Padjust
Calcium KW-0106	Cell Adhesion (KW-0130)	156	106.74
Calcium KW-0106	Signal (KW-0732)	404	80.09
Calcium KW-0106	EGF-like domain (KW-0245)	83	58.18
Calcium KW-0106	Plasma Membrane (GO:0005904)	379	43.74
Calcium KW-0106	Extracellular Matrix (KW-0272)	57	28.33
Calcium KW-0106	Zymogen (KW-0865)	43	17.89
Calcium KW-0106	Cell Junction (KW-0965)	68	12.74
Calcium KW-0106	Calmodulin Binding (GO:0005516)	35	9.96
Calcium KW-0106	Blood Coagulation (KW-0094)	15	8.74
Calcium KW-0106	Manganese Ion Transport (GO:0006828)	7	2.96
Calcium KW-0106	Nitric Oxide Signaling Pathway (m_nos1Pathway Biocarta)	7	1.89
Calcium KW-0106	Copper (KW-0186)	8	1.72
Calcium KW-0106	Wound Healing (GO:0042060)	13	1.68
Calcium KW-0106	Immunity (KW-0391)	25	1.4
Calcium KW-0106	Angiogenesis (KW-0037)	11	1.34
Magnesium KW-0460	Manganese (KW-0464)	85	85.52
Magnesium KW-0460	Protein Phosphorylation (GO:0006468)	119	67.47
Magnesium KW-0460	Metabolic Pathways (mmu01100)	124	19.68
Magnesium KW-0460	Biosynthesis of Antibiotics (mmu01130)	43	15.31
Magnesium KW-0460	DNA Repair (KW-0234)	29	9.35
Magnesium KW-0460	Platelet Activation (mmu04611)	23	6.7
Magnesium KW-0460	Calcium (KW-0106)	45	6
Magnesium KW-0460	Estrogen Signaling Pathway (mmu04915)	17	4.74
Magnesium KW-0460	TGF-beta Signaling Pathway (mmu04350)	13	3
Magnesium KW-0460	Ion Transport (KW-0406)	29	2.74
Magnesium KW-0460	Potassium (KW-0630)	11	2.74
Magnesium KW-0460	Cell Division (GO:0051301)	24	2.03
Magnesium KW-0460	SMAD Binding (GO:0046332)	8	2
Magnesium KW-0460	Growth Factor Binding (GO:0019838)	7	1.82
Iron KW-0408	Oxidoreductase (KW-0560)	240	294.74
Iron KW-0408	Heme Binding (GO:0020037)	148	229.51
Iron KW-0408	Steroid Hydroxylase Activity (GO:0008395)	51	79.01
Iron KW-0408	Aromatase Activity (GO:0070330)	36	56.89
Iron KW-0408	Metabolic Pathways (mmu01100)	139	55.55
Iron KW-0408	Vitamin C (KW-0847)	15	20.13
Iron KW-0408	Ferritin (IPR001519)	11	106.74
Iron KW-0408	Response to Hypoxia (GO:0001666)	20	80.09
Iron KW-0408	PPAR Signaling Pathway (mmu03320)	15	58.18
Iron KW-0408	Hydrogen Peroxide (KW-0376)	5	43.74
Iron KW-0408	Histone Demethylase Activity (GO:0032452)	6	28.33
Iron KW-0408	Copper (KW-0186)	6	17.89
Iron KW-0408	Membrane (GO:0016020)	145	12.74
Zinc KW-0862	Regulation of Transcription (GO:0006355)	851	9.96
Zinc KW-0862	Metalloprotease (KW-0482)	124	8.74
Zinc KW-0862	Chromatin Binding (GO:0003682)	137	2.96
Zinc KW-0862	Zymogen (KW-0865)	62	1.89
Zinc KW-0862	p53 binding (GO:0002039)	27	1.72
Zinc KW-0862	Methylation (GO:0032259)	45	1.68
Zinc KW-0862	Apoptosis (KW-0053)	78	1.4
Zinc KW-0862	Differentiation (KW-0221)	93	1.34
Zinc KW-0862	Androgen Receptor Binding (GO:0050681)	13	85.52
Zinc KW-0862	Oestrogen Receptor (IPR024178)	5	67.47
Zinc KW-0862	TGF-Beta Signaling Pathway (mmu04350)	15	19.68
Zinc KW-0862	Notch Signaling Pathway (KW-0914)	12	15.31
Zinc KW-0862	NF-kappa B Signaling Pathway (mmu04064)	16	9.35
Zinc KW-0862	Wnt Signaling Pathway (mmu04310)	20	6.7
Copper KW-0186	Oxidoreductase (KW-0560)	29	6
Copper KW-0186	Electron Transport (KW-0249)	6	4.74
Copper KW-0186	Mineral Absorption (mmu04978)	5	3
Copper KW-0186	Removal of Superoxide Radicals (GO:0019430)	4	2.74
Copper KW-0186	Transport (GO:0006810)	18	2.74
Copper KW-0186	Locomotory Behavior (GO:0007626)	5	2.03
Copper KW-0186	Iron (KW-0408)	6	2
Copper KW-0186	Perinuclear Region of Cytoplasm (GO:0048471)	9	1.82
Manganese KW-0464	Protein Glycosylation (GO:0006486)	37	294.74
Manganese KW-0464	Metabolic Pathways (mmu01100)	69	229.51
Manganese KW-0464	Magnesium Ion Binding (GO:0000287)	20	79.01
Manganese KW-0464	TGF-Beta Signaling Pathway (mmu04350)	13	56.89
Manganese KW-0464	SMAD binding (GO:0046332)	8	55.55
Manganese KW-0464	Growth Factor Binding (GO:0019838)	7	20.13
Manganese KW-0464	Platelet Activation (mmu04611)	12	106.74
Manganese KW-0464	Acetylation (KW-0007)	45	80.09
Manganese KW-0464	Oxidoreductase Activity (GO:0016616)	5	58.18
Manganese KW-0464	Arginine and Proline Metabolism (mmu00330)	6	43.74
Manganese KW-0464	Estrogen Signaling Pathway (mmu04915)	8	28.33
Manganese KW-0464	BMP Signaling Pathway (GO:0030509)	7	17.89
*KW = UniProt KB keyword. GO = Gene Ontology. mmu = KEGG pathway. IPR = Interpro. Padjust = Benjamini-Hochberg adjusted P value.

## Sheet: S4
Table S4. Overrepresentation of metal UniProt Knowledge Base (KB) genes within the top 1000 expressed genes in different organs (Figure 2G)*
Organ	Metal	Observed	Expected	Fold Change	P Value
Skin	Ca	68	19	3.86	3.7e-21
Skin	Mg	36	11	3.23	1.13e-09
Skin	Fe	25	8	3.22	4.09e-07
Skin	Zn	74	48	1.56	0.000134
Skin	Cu	15	4	3.58	2.35e-05
Skin	Mn	9	1	7.06	4.76e-06
Skin	Co	1	1	1	0.636
Brain	Ca	78	19	4.42	6.24e-28
Brain	Mg	42	11	3.77	3.29e-13
Brain	Fe	14	8	1.8	0.0261
Brain	Zn	95	48	2	1.62e-10
Brain	Cu	10	4	2.39	0.00989
Brain	Mn	5	1	3.92	0.00893
Brain	Co	4	1	4.01	0.0175
Esophagus	Ca	85	19	4.82	4.57e-33
Esophagus	Mg	40	11	3.59	5.54e-12
Esophagus	Fe	30	8	3.86	4.38e-10
Esophagus	Zn	85	48	1.79	2.16e-07
Esophagus	Cu	16	4	3.82	5.62e-06
Esophagus	Mn	8	1	6.28	3.89e-05
Esophagus	Co	2	1	2	0.264
Heart	Ca	55	19	3.12	1.83e-13
Heart	Mg	46	11	4.12	8.5e-16
Heart	Fe	25	8	3.22	4.09e-07
Heart	Zn	93	48	1.96	7.54e-10
Heart	Cu	16	4	3.82	5.62e-06
Heart	Mn	6	1	4.71	0.00171
Heart	Co	3	1	3	0.0779
Thymus	Ca	40	19	2.27	1.9e-06
Thymus	Mg	37	11	3.32	3.11e-10
Thymus	Fe	14	8	1.8	0.0261
Thymus	Zn	141	48	2.96	6.02e-31
Thymus	Cu	9	4	2.15	0.0257
Thymus	Mn	1	1	0.78	0.635
Thymus	Co	3	1	3	0.0779
Quadriceps	Ca	57	19	3.23	1.47e-14
Quadriceps	Mg	47	11	4.21	1.8e-16
Quadriceps	Fe	28	8	3.6	7.59e-09
Quadriceps	Zn	88	48	1.85	2.84e-08
Quadriceps	Cu	18	4	4.3	2.66e-07
Quadriceps	Mn	7	1	5.49	0.000277
Quadriceps	Co	4	1	4.01	0.0175
Kidney	Ca	56	19	3.18	5.24e-14
Kidney	Mg	44	11	3.94	1.76e-14
Kidney	Fe	42	8	5.4	9.95e-19
Kidney	Zn	68	48	1.43	0.0022
Kidney	Cu	20	4	4.78	9.95e-09
Kidney	Mn	9	1	7.06	4.76e-06
Kidney	Co	6	1	6.01	0.000463
Colon	Ca	70	19	3.97	1.86e-22
Colon	Mg	46	11	4.12	8.5e-16
Colon	Fe	22	8	2.83	1.52e-05
Colon	Zn	83	48	1.74	7.85e-07
Colon	Cu	15	4	3.58	2.35e-05
Colon	Mn	7	1	5.49	0.000277
Colon	Co	1	1	1	0.636
Ileum	Ca	66	19	3.74	6.88e-20
Ileum	Mg	46	11	4.12	8.5e-16
Ileum	Fe	27	8	3.47	2.98e-08
Ileum	Zn	75	48	1.58	8.01e-05
Ileum	Cu	15	4	3.58	2.35e-05
Ileum	Mn	8	1	6.28	3.89e-05
Ileum	Co	3	1	3	0.0779
Jejenum	Ca	74	19	4.2	3.86e-25
Jejenum	Mg	55	11	4.93	3.2e-22
Jejenum	Fe	30	8	3.86	4.38e-10
Jejenum	Zn	81	48	1.7	2.7e-06
Jejenum	Cu	20	4	4.78	9.95e-09
Jejenum	Mn	7	1	5.49	0.000277
Jejenum	Co	4	1	4.01	0.0175
Duodenum	Ca	68	19	3.86	3.7e-21
Duodenum	Mg	49	11	4.39	7.53e-18
Duodenum	Fe	38	8	4.89	1.24e-15
Duodenum	Zn	81	48	1.7	2.7e-06
Duodenum	Cu	19	4	4.54	5.29e-08
Duodenum	Mn	8	1	6.28	3.89e-05
Duodenum	Co	4	1	4.01	0.0175
Stomach	Ca	64	19	3.63	1.19e-18
Stomach	Mg	37	11	3.32	3.11e-10
Stomach	Fe	25	8	3.22	4.09e-07
Stomach	Zn	65	48	1.37	0.00733
Stomach	Cu	17	4	4.06	1.26e-06
Stomach	Mn	6	1	4.71	0.00171
Stomach	Co	4	1	4.01	0.0175
Liver	Ca	43	19	2.44	1.14e-07
Liver	Mg	33	11	2.96	4.44e-08
Liver	Fe	67	8	8.62	6.11e-42
Liver	Zn	48	48	1.01	0.495426
Liver	Cu	14	4	3.35	9.16e-05
Liver	Mn	11	1	8.63	5e-08
Liver	Co	7	1	7.01	5.74e-05
Pancreas	Ca	38	19	2.15	1.09e-05
Pancreas	Mg	27	11	2.42	2.85e-05
Pancreas	Fe	26	8	3.34	1.13e-07
Pancreas	Zn	60	48	1.26	0.0401
Pancreas	Cu	12	4	2.87	0.00112
Pancreas	Mn	6	1	4.71	0.00171
Pancreas	Co	3	1	3	0.0779
*Fold change observed vs expected genes. Skin data from RNA-Seq. Other organs from Söllner et al., 2017. Calcium (KW-0106), Magnesium (KW-0460), Iron (KW-0408), Zinc (KW-0862), Copper (KW-0186), Manganese (KW-0464) and Cobalt (KW-0170).

## Sheet: S5
Table S5. Genes that overlap both wound healing gene ontology (GO: 0042060) and combined metal UniProt Knowledge Base (KB) lists, plus individual metal annotation (Figure 2H)*
Ensembl ID	Gene ID	Metal Annotation
ENSMUSG00000000318	Clec10a	Calcium
ENSMUSG00000000320	Alox12	Iron
ENSMUSG00000000530	Acvrl1	Magnesium
ENSMUSG00000001131	Timp1	Zinc
ENSMUSG00000001506	Col1a1	Calcium
ENSMUSG00000002250	Ppard	Zinc
ENSMUSG00000002633	Shh	Calcium, Zinc
ENSMUSG00000003534	Ddr1	Calcium
ENSMUSG00000004383	Large1	Copper
ENSMUSG00000005148	Klf5	Zinc
ENSMUSG00000005413	Hmox1	Iron
ENSMUSG00000006369	Fbln1	Calcium
ENSMUSG00000009207	Lnpk	Zinc
ENSMUSG00000014852	Adamts13	Calcium, Zinc
ENSMUSG00000015053	Gata2	Zinc
ENSMUSG00000015085	Entpd2	Calcium, Magnesium
ENSMUSG00000016028	Celsr1	Calcium
ENSMUSG00000017950	Hnf4a	Zinc
ENSMUSG00000018340	Anxa6	Calcium
ENSMUSG00000018924	Alox15	Calcium, Iron
ENSMUSG00000020611	Gna13	Magnesium
ENSMUSG00000021754	Map3k1	Zinc
ENSMUSG00000021944	Gata4	Zinc
ENSMUSG00000021948	Prkcd	Zinc
ENSMUSG00000021950	Anxa8	Calcium
ENSMUSG00000021999	Cpb2	Zinc
ENSMUSG00000022178	Ajuba	Zinc
ENSMUSG00000022383	Ppara	Zinc
ENSMUSG00000022676	Snai2	Zinc
ENSMUSG00000022836	Mylk	Calcium, Magnesium
ENSMUSG00000022912	Pros1	Calcium
ENSMUSG00000023067	Cdkn1a	Zinc
ENSMUSG00000023886	Smoc2	Calcium
ENSMUSG00000023961	Enpp4	Zinc
ENSMUSG00000024386	Proc	Calcium
ENSMUSG00000024515	Smad4	Zinc
ENSMUSG00000024529	Lox	Manganese
ENSMUSG00000024659	Anxa1	Calcium
ENSMUSG00000024743	Syt7	Calcium
ENSMUSG00000025105	Bnc1	Zinc
ENSMUSG00000025701	Alox5	Calcium, Iron
ENSMUSG00000025809	Itgb1	Magnesium
ENSMUSG00000026043	Col3a1	Calcium
ENSMUSG00000026131	Dst	Calcium
ENSMUSG00000026175	Vil1	Calcium
ENSMUSG00000026177	Slc11a1	Iron
ENSMUSG00000026579	F5	Calcium, Manganese
ENSMUSG00000026580	Selp	Calcium
ENSMUSG00000026778	Prkcq	Magnesium, Zinc
ENSMUSG00000027249	F2	Calcium
ENSMUSG00000027523	Gnas	Magnesium
ENSMUSG00000027712	Anxa5	Calcium
ENSMUSG00000028001	Fga	Calcium
ENSMUSG00000028413	B4galt1	Copper
ENSMUSG00000028649	Macf1	Calcium
ENSMUSG00000029217	Tec	Zinc
ENSMUSG00000030168	Adipor2	Zinc
ENSMUSG00000031138	F9	Calcium, Magnesium
ENSMUSG00000031162	Gata1	Zinc
ENSMUSG00000031196	F8	Calcium
ENSMUSG00000031255	Sytl4	Zinc
ENSMUSG00000031443	F7	Calcium
ENSMUSG00000031444	F10	Calcium
ENSMUSG00000031445	Proz	Calcium
ENSMUSG00000031451	Gas6	Calcium
ENSMUSG00000031849	Comp	Calcium
ENSMUSG00000032231	Anxa2	Calcium
ENSMUSG00000032294	Pkm	Magnesium
ENSMUSG00000032402	Smad3	Zinc
ENSMUSG00000033268	Duox1	Calcium
ENSMUSG00000033373	Fntb	Zinc
ENSMUSG00000033788	Dysf	Calcium
ENSMUSG00000033860	Fgg	Calcium
ENSMUSG00000034664	Itga2b	Calcium
ENSMUSG00000035273	Hpse	Calcium, Magnesium
ENSMUSG00000037942	Crp	Calcium
ENSMUSG00000039087	Rreb1	Zinc
ENSMUSG00000039109	F13a1	Calcium
ENSMUSG00000040152	Thbs1	Calcium
ENSMUSG00000042828	Trim72	Zinc
ENSMUSG00000045038	Prkce	Zinc
ENSMUSG00000048120	Entpd1	Calcium, Magnesium
ENSMUSG00000049723	Mmp12	Calcium, Zinc
ENSMUSG00000050965	Prkca	Zinc
ENSMUSG00000053399	Adamts18	Zinc
ENSMUSG00000056071	S100a9	Calcium, Zinc
ENSMUSG00000056220	Pla2g4a	Calcium
ENSMUSG00000057880	Abat	Iron
ENSMUSG00000064210	Ano6	Calcium
ENSMUSG00000068452	Duox2	Calcium
ENSMUSG00000068923	Syt11	Calcium
ENSMUSG00000079110	Capn3	Calcium
*UniProt KB Keyword terms: Calcium (KW-0106), Magnesium (KW-0460), Iron (KW-0408), Zinc (KW-0862), Copper (KW-0186), Manganese (KW-0464).

## Sheet: S6
Table S6. Z scores of top 250 most significantly differentially expressed genes from hierarchal clustering of RNA sequencing data (Supplementary Figure S3)
Ensemble ID	Gene Symbol	Cluster	D0	D0	D0	D1	D1	D1	D3	D3	D3	D7	D7	D7	D14	D14	D14
ENSMUSG00000029093	Sorcs2	1	-1.32	-1.11	-0.9	-0.73	-1.34	-0.81	0.15	0.2	-0.02	1.61	1.63	0.83	0.87	0.36	0.58
ENSMUSG00000052316	Lrrc15	1	-1.22	-0.96	-1.16	-1.01	-1.28	-0.96	0.11	0.11	0.12	1.18	1.15	1.01	0.93	0.84	1.15
ENSMUSG00000026494	Kif26b	1	-1.38	-0.72	-0.38	-0.84	-1.06	-1.4	-0.11	-0.18	-0.03	1.67	1.54	1.23	0.56	0.7	0.38
ENSMUSG00000022324	Matn2	1	-0.76	-0.81	-0.69	-1.15	-1.36	-1.51	0.18	0.38	-0.2	1.32	1.49	1.12	0.69	0.8	0.5
ENSMUSG00000058260	Serpina9	1	-1.56	-1.25	-1.08	-0.8	-0.83	-1.13	0.5	0.36	0.47	1.52	1.22	0.63	0.82	0.82	0.32
ENSMUSG00000008136	Fhl2	1	-1.4	-1.35	-1.09	-1.08	-0.89	-0.75	0.61	0.71	0.62	1.29	1.35	0.78	0.92	0.51	-0.22
ENSMUSG00000058914	C1qtnf3	1	-0.85	-1.04	-1.32	-1.13	-1.15	-0.89	0.41	0.23	-0.05	1.28	1.63	1.04	0.39	1.1	0.36
ENSMUSG00000031595	Pdgfrl	1	-0.71	-1.31	-1.72	-0.65	-1.03	-1.11	0.5	0.35	0.44	1.26	1.4	1.03	0.49	0.78	0.28
ENSMUSG00000021260	Hhipl1	1	-0.65	-0.82	-1.46	-1.3	-0.97	-1.1	0.77	0.52	0.59	1.29	1.45	1.33	0.01	0.46	-0.11
ENSMUSG00000032332	Col12a1	1	-1.05	-1.11	-1.04	-1.01	-1.49	-0.7	0.52	0.36	0.52	1.62	1.41	1.14	0.2	0.47	0.16
ENSMUSG00000009214	Mymk	1	-1.22	-0.88	-0.91	-1.26	-1.38	-1.1	1.05	0.94	0.93	0.91	1.12	0.9	-0.02	0.63	0.28
ENSMUSG00000027797	Dclk1	1	-1.41	-1.33	-1.28	-0.57	-1.09	-0.85	0.7	0.81	0.79	1.14	1.46	0.9	-0.05	0.52	0.26
ENSMUSG00000061086	Myl4	1	-1.01	-1.28	-1.06	-1.17	-1.17	-0.81	0.79	0.75	0.72	1.07	1.45	1.08	-0.11	0.81	-0.03
ENSMUSG00000046841	Ckap4	1	-1.64	-1.4	-1.54	-0.51	-0.3	0.2	1.19	0.77	1.24	1.13	1.07	0.52	-0.27	0.09	-0.54
ENSMUSG00000028364	Tnc	1	-1.8	-1.58	-1.73	-0.31	-0.24	0.18	0.87	0.61	1.02	1.03	0.99	0.92	0.08	0.1	-0.15
ENSMUSG00000022844	Pdia5	1	-1.35	-1.38	-1.38	-0.49	-0.74	-0.41	1.19	1.09	1.16	1	1.22	0.72	-0.2	0.18	-0.61
ENSMUSG00000054046	Klk13	1	-1.3	-1.37	-1.38	-0.55	-0.59	-0.06	0.98	0.98	1.11	1.31	1.28	0.56	-0.03	0.08	-1.03
ENSMUSG00000027533	Fabp5	1	-1.23	-1.46	-1.35	-0.77	-0.49	-0.12	0.98	0.97	1.24	1.36	1.38	0.41	-0.1	-0.35	-0.47
ENSMUSG00000001435	Col18a1	1	-1.78	-1.54	-1.43	-0.78	-0.25	-0.5	0.58	0.54	0.63	1.51	0.99	0.88	0.43	0.34	0.4
ENSMUSG00000037263	Aldh3b3	1	-1.36	-1.8	-1.65	-0.8	-0.47	-0.31	0.46	0.86	0.8	1.36	0.8	0.47	0.68	0.44	0.52
ENSMUSG00000049723	Mmp12	1	-1.68	-1.59	-1.87	-0.74	0.07	0.16	0.47	0.04	0.99	0.96	1.1	0.7	0.24	0.7	0.44
ENSMUSG00000022468	Endou	1	-1.36	-1.6	-1.94	-0.39	-0.28	-0.03	0.68	0.7	0.84	1.25	1.48	0.31	0.02	-0.03	0.34
ENSMUSG00000052353	Cemip	1	-1.64	-2.03	-1.38	0.25	-0.81	-0.02	0.48	0.56	0.89	1.26	1.02	0.51	0.12	0.31	0.46
ENSMUSG00000058672	Tubb2a	1	-1.69	-1.68	-2.06	0.05	-0.06	0.41	0.91	0.64	0.95	0.74	0.62	-0.17	0.35	0.16	0.81
ENSMUSG00000040055	Gjb6	1	-1.74	-1.68	-1.91	-0.14	-0.33	0.17	0.83	0.85	0.88	0.76	0.94	0.14	0.69	0.06	0.46
ENSMUSG00000046352	Gjb2	1	-1.78	-1.87	-1.83	-0.13	-0.13	0.33	0.57	0.59	0.74	0.57	0.55	0.19	1.03	0.32	0.87
ENSMUSG00000015652	Steap1	1	-1.98	-1.47	-1.75	0.55	0.03	0.48	0.93	0.89	1.38	0.17	0.13	-0.23	0.73	-0.13	0.26
ENSMUSG00000000957	Mmp14	1	-1.57	-1.29	-1.71	-0.09	0.23	-0.05	0.38	0.01	0.2	1.33	1.57	1.38	-0.61	0.41	-0.2
ENSMUSG00000011256	Adam19	1	-1.37	-1.55	-1.99	0.21	0.38	0.4	0.56	0.09	0.53	1.25	1.19	1.13	-0.45	0.19	-0.56
ENSMUSG00000031538	Plat	1	-1.23	-1.34	-2.18	0.11	-0.19	-0.31	0.54	-0.15	0.47	1.18	1.59	1.02	0.35	0.37	-0.22
ENSMUSG00000024598	Fbn2	1	-1.77	-1.29	-1.89	0.15	0.14	-0.34	0.55	0.2	0.64	1.11	1.21	0.99	0.36	0.63	-0.7
ENSMUSG00000027230	Creb3l1	1	-1.63	-1.44	-1.89	-0.1	-0.13	-0.11	0.57	0.24	0.75	1.4	1.35	0.85	-0.02	0.4	-0.25
ENSMUSG00000031673	Cdh11	1	-1.85	-0.71	-1.57	-0.28	-0.54	-0.47	0.17	-0.21	-0.05	1.39	1.55	1.28	0.61	0.77	-0.1
ENSMUSG00000027750	Postn	1	-0.99	-1.09	-0.87	-0.55	-0.63	-0.83	0.05	-0.09	-0.1	1.75	1.99	1.45	-0.37	0.57	-0.31
ENSMUSG00000033149	Phldb2	1	-1.28	-0.91	-1.39	-0.69	-0.73	-0.79	0.35	0.19	0.29	2	1.42	1.23	0.23	0.31	-0.22
ENSMUSG00000029661	Col1a2	1	-1.14	-1.05	-1.93	-0.54	-0.44	-0.91	0.73	0.53	0.61	1.22	1.52	0.98	0.1	0.7	-0.4
ENSMUSG00000001506	Col1a1	1	-1.18	-1.1	-1.74	-0.59	-0.43	-0.9	0.77	0.51	0.72	1.31	1.5	1.08	0.06	0.48	-0.5
ENSMUSG00000054196	Cthrc1	1	-1.75	-1.13	-1.52	-0.59	-0.51	-0.55	0.84	0.6	0.75	1.19	1.37	1.01	-0.08	0.65	-0.27
ENSMUSG00000041984	Rptn	1	-1.3	-1.27	-1.54	-0.64	-0.54	-0.65	0.88	0.75	0.81	1.26	1.34	0.83	-0.48	0.89	-0.35
ENSMUSG00000005124	Wisp1	1	-1.41	-1.23	-1.36	-0.73	-0.65	-0.59	0.69	0.45	0.78	1.42	1.43	1.26	0.09	0.37	-0.53
ENSMUSG00000035914	Cd276	1	-1.58	-1.39	-1.21	-0.49	-0.38	-0.43	0.86	0.34	0.69	1.36	1.59	1.09	-0.27	0.44	-0.63
ENSMUSG00000032122	Slc37a2	2	-1.4	-1.57	-1.89	0.17	0.02	-0.07	0.81	0.83	1.06	1.01	1.4	0.38	-0.13	0.01	-0.63
ENSMUSG00000054905	Stfa3	2	-1.32	-1.6	-1.62	-0.14	0.07	0.14	0.82	0.87	0.89	1.1	1.19	0.73	-0.41	0.43	-1.15
ENSMUSG00000048455	Sprr1b	2	-1.38	-1.91	-1.61	0.19	0.34	0.38	0.9	0.85	0.92	0.96	1	0.55	-0.73	0.18	-0.64
ENSMUSG00000023992	Trem2	2	-1.56	-1.61	-1.84	0.39	0.47	0.04	0.95	0.81	1.08	0.67	1.01	0.57	-0.67	0.16	-0.47
ENSMUSG00000029581	Fscn1	2	-1.82	-1.37	-1.83	0.04	0.38	0.49	0.87	0.69	1.05	0.96	0.9	0.61	-0.32	0.06	-0.7
ENSMUSG00000045382	Cxcr4	2	-1.37	-1.48	-2.06	0.01	0.27	0.74	0.74	0.48	1.31	1.06	0.89	0.46	-0.6	-0.25	-0.2
ENSMUSG00000034591	Slc41a2	2	-1.54	-1.38	-2.25	0.21	0.33	0.56	0.98	0.62	1.13	0.65	0.92	0.4	-0.28	-0.21	-0.12
ENSMUSG00000037280	Galnt6	2	-1.75	-1.84	-1.85	0.05	0.42	0.83	0.61	0.67	0.96	0.84	0.87	0.14	-0.03	-0.07	0.17
ENSMUSG00000050063	Klk6	2	-1.66	-1.74	-1.78	0.12	0.23	0.65	0.93	0.9	1.01	0.91	0.91	0.24	-0.29	-0.2	-0.22
ENSMUSG00000046259	Sprr2h	2	-1.73	-1.6	-1.62	0.16	0.39	0.2	0.85	0.76	0.95	0.94	1.23	0.39	-0.85	-0.29	0.21
ENSMUSG00000023041	Krt6b	2	-1.31	-1.71	-1.33	0.16	0.29	0.74	0.95	0.96	1.05	0.9	0.81	0.53	-1.23	0.03	-0.85
ENSMUSG00000053797	Krt16	2	-1.4	-1.86	-1.61	0.06	0.28	0.7	0.92	0.91	1	0.87	0.88	0.5	-0.96	0.01	-0.3
ENSMUSG00000084257	Gm11597	2	-1.28	-1.61	-1.83	0.02	0.24	0.72	0.83	0.95	1.04	0.92	0.91	0.54	-1.04	-0.03	-0.36
ENSMUSG00000046805	Mpeg1	2	-1.23	-1.25	-2	0.55	0.36	0.76	0.86	0.64	1.23	0.75	0.86	0.46	-1.12	-0.2	-0.67
ENSMUSG00000044811	Cd300c2	2	-1.16	-1.31	-1.93	0.37	0.67	0.51	1.02	0.81	1.35	0.58	0.83	0.24	-1	-0.1	-0.88
ENSMUSG00000038642	Ctss	2	-1.2	-1.33	-1.97	0.6	0.37	0.54	1.07	0.8	1.36	0.45	0.8	0.39	-0.99	-0.2	-0.68
ENSMUSG00000024529	Lox	2	-1.59	-1.62	-1.74	0.16	0.23	0.42	1.23	0.9	1.37	0.48	0.68	0.39	-0.55	0.13	-0.48
ENSMUSG00000068335	Dok1	2	-1.45	-1.25	-1.89	0.32	0.29	0.24	1.32	0.94	1.56	0.64	0.42	0.28	-0.82	-0.28	-0.32
ENSMUSG00000000555	Itga5	2	-1.51	-1.49	-1.41	0	0.14	0.58	1.29	0.73	1.42	0.75	0.59	0.68	-0.42	-0.16	-1.17
ENSMUSG00000032454	Rbp2	2	-1.32	-1.35	-1.45	-0.08	-0.18	0.3	1	0.98	1.19	1.13	1.28	0.44	-0.64	-0.15	-1.15
ENSMUSG00000052180	Serpinb6c	2	-1.07	-1.44	-1.12	-0.27	-0.04	0.42	1.09	1.15	1.32	1.04	1.08	0.42	-1.16	-0.36	-1.06
ENSMUSG00000079451	Tmprss11g	2	-1.27	-1.34	-1.29	-0.23	-0.34	0.66	1.4	1.21	1.28	0.94	0.87	0.26	-0.92	-0.59	-0.62
ENSMUSG00000046354	Defb14	2	-0.91	-1.12	-1.29	0.3	0.16	0.12	1.38	1.03	1.4	1.09	0.5	0.46	-1.13	-0.65	-1.34
ENSMUSG00000020553	Pctp	2	-0.74	-1.1	-0.99	-0.19	-0.18	-0.41	1.39	1.91	2.01	0.43	-0.3	-0.13	-0.64	-0.25	-0.81
ENSMUSG00000037411	Serpine1	2	-0.78	-0.69	-0.87	1.14	0.76	1.3	1.07	0.64	1.37	0.04	-0.32	0.21	-1.16	-1.23	-1.47
ENSMUSG00000029371	Cxcl5	2	-0.99	-0.96	-1.19	1.31	0.97	1.38	1.01	0.59	1.34	-0.09	-0.57	0.02	-0.94	-0.95	-0.9
ENSMUSG00000023947	Nfkbie	2	-1.24	-1.1	-1.28	1.42	1	1.35	0.83	0.29	1.23	0.39	-0.01	-0.38	-0.97	-0.6	-0.93
ENSMUSG00000029380	Cxcl1	2	-1.06	-1.21	-1.24	1.34	1.16	1.14	1.25	0.38	1.08	0	0.05	-0.17	-0.81	-0.95	-0.98
ENSMUSG00000035385	Ccl2	2	-1.22	-0.97	-1.4	1.28	1.32	1.67	0.95	0.17	0.92	-0.01	-0.28	-0.48	-0.8	-0.36	-0.77
ENSMUSG00000011008	Mcoln2	2	-1.12	-0.83	-1.34	1.41	1.21	1.35	0.72	0.54	1.36	-0.51	-0.14	-0.5	-0.93	-0.31	-0.9
ENSMUSG00000030790	Adm	2	-0.59	-0.8	-0.86	1.88	1.11	1.47	0.69	0.26	1.18	-0.61	-0.43	-0.64	-1.02	-0.94	-0.72
ENSMUSG00000021091	Serpina3n	2	-0.97	-0.86	-1.23	0.53	1.21	1.25	1.23	1.08	1.37	-0.75	-0.41	-0.98	-0.94	0.04	-0.59
ENSMUSG00000006014	Prg4	2	-1.03	-0.72	-1.08	1.13	0.94	1.04	1.34	1.09	1.42	-0.6	-0.49	-0.77	-0.98	-0.54	-0.75
ENSMUSG00000074115	Saa1	2	-0.67	-0.77	-0.92	0.97	1.21	1.4	1.02	1.07	1.28	-0.6	-0.57	-0.77	-1.23	-0.48	-0.95
ENSMUSG00000040026	Saa3	2	-0.94	-1.39	-1.04	1.09	1.1	1.02	1.13	1.05	1.4	-0.38	-0.32	-0.38	-1.02	-0.62	-0.7
ENSMUSG00000047592	Nxpe5	2	-0.79	-1.25	-1.16	1.17	1.08	0.61	1.26	0.99	1.6	-0.64	-0.29	-0.48	-0.89	-0.27	-0.93
ENSMUSG00000024300	Myo1f	2	-1.06	-1.23	-1.7	0.93	0.59	0.67	1.09	0.79	1.38	0.26	0.71	0.09	-1.32	-0.43	-0.77
ENSMUSG00000020901	Pik3r5	2	-1.11	-1.28	-1.6	1.02	0.67	0.77	1.04	0.83	1.34	0.19	0.57	0.18	-1.25	-0.52	-0.85
ENSMUSG00000034652	Cd300a	2	-1.14	-0.91	-1.4	0.7	0.62	0.75	0.89	0.7	1.51	0.55	0.75	0.34	-1.31	-0.79	-1.26
ENSMUSG00000040552	C3ar1	2	-1.2	-1.11	-1.81	0.55	0.64	0.77	1.08	0.76	1.37	0.41	0.77	0.26	-1.11	-0.44	-0.94
ENSMUSG00000018774	Cd68	2	-1.25	-1.22	-1.67	0.65	0.82	0.73	1.05	0.58	1.42	0.52	0.7	0.05	-1.12	-0.29	-0.98
ENSMUSG00000033777	Tlr13	2	-1.36	-1.3	-1.57	0.47	0.66	1.08	0.89	0.75	1.38	0.63	0.63	0.1	-1.01	-0.39	-0.96
ENSMUSG00000073412	Lst1	2	-1.28	-0.99	-1.4	0.98	0.94	0.87	1.15	0.56	1.42	0.26	0.4	-0.05	-1.13	-0.56	-1.16
ENSMUSG00000021190	Lgmn	2	-1.16	-1.15	-1.3	0.66	0.9	0.8	1.3	0.93	1.48	-0.01	0.32	-0.18	-1.27	-0.23	-1.1
ENSMUSG00000001131	Timp1	2	-1.33	-1.06	-1.71	0.79	0.71	1.08	1.19	0.77	1.39	0.15	0.14	0.04	-0.83	-0.27	-1.07
ENSMUSG00000044827	Tlr1	2	-1.49	-1.07	-1.6	0.76	0.75	1.09	1.01	0.8	1.31	0.26	0.51	0.02	-0.99	-0.43	-0.93
ENSMUSG00000009185	Ccl8	2	-1.1	-1.6	-1.78	1.12	0.78	0.15	1.21	1.02	1.36	-0.29	0.12	-0.61	-0.43	0.28	-0.23
ENSMUSG00000027408	Cpxm1	2	-1.3	-1.53	-2.05	0.78	0.85	0.76	0.97	0.79	1.1	0.25	0.45	0.07	-0.25	-0.04	-0.85
ENSMUSG00000023913	Pla2g7	2	-1.48	-1.1	-2.09	0.74	0.64	0.79	0.97	0.72	1.46	0.33	0.4	-0.08	-0.23	-0.24	-0.82
ENSMUSG00000060216	Arrb2	2	-1.38	-1.36	-1.61	0.68	0.88	0.52	1.22	0.69	1.78	0.09	0.22	-0.2	-0.51	-0.32	-0.71
ENSMUSG00000037902	Sirpa	2	-1.35	-1.27	-1.6	0.56	0.66	0.52	1.29	0.86	1.53	0.25	0.67	-0.06	-0.94	-0.25	-0.86
ENSMUSG00000040613	Apobec1	2	-1.05	-1.52	-1.98	0.93	0.85	0.94	0.92	0.73	1.29	-0.17	0.6	-0.05	-0.46	-0.47	-0.54
ENSMUSG00000056124	B4galt6	2	-1.16	-1.23	-1.8	0.89	0.52	0.77	1.43	0.9	1.52	-0.23	0.3	-0.49	-0.63	-0.36	-0.43
ENSMUSG00000029771	Irf5	2	-1.34	-1.45	-1.34	0.92	1.27	1.43	0.89	0.56	1.17	-0.15	0.18	-0.5	-0.82	-0.29	-0.52
ENSMUSG00000079227	Ccr5	2	-1.35	-1.13	-1.68	0.93	1.51	1.34	0.7	0.48	1.01	-0.03	0.22	-0.3	-0.87	-0.15	-0.68
ENSMUSG00000074417	Gm14548	2	-1.23	-1.26	-1.48	1.2	1.16	1.74	0.7	0.26	1.01	-0.17	0.02	-0.45	-0.94	-0.08	-0.47
ENSMUSG00000089942	Pira2	2	-1.4	-1.49	-1.45	1.12	1.06	1.58	0.69	0.36	1.07	0.18	-0.09	-0.42	-0.83	0.06	-0.45
ENSMUSG00000030830	Itgal	2	-1.18	-1.23	-1.42	1.06	1.1	1.86	0.32	0.19	1.22	0.22	0.19	-0.26	-0.54	-0.69	-0.86
ENSMUSG00000026271	Gpr35	2	-1.17	-1.3	-1.59	0.94	0.97	1.58	0.66	0.42	1.14	0.5	0.35	-0.52	-0.41	-0.5	-1.06
ENSMUSG00000025877	Hk3	2	-1.43	-1.04	-1.46	0.89	1.02	1.24	0.87	0.51	1.13	0.74	0.3	-0.22	-1.11	-0.46	-0.98
ENSMUSG00000021298	Gpr132	2	-1.47	-1.07	-1.56	1.08	1.03	1.39	0.72	0.54	1.19	0.43	0.02	-0.11	-0.8	-0.54	-0.87
ENSMUSG00000024675	Ms4a4c	2	-1.39	-1.13	-1.5	0.87	0.96	1.43	0.8	0.59	1.15	0.24	0.39	-0.01	-1.04	-0.31	-1.05
ENSMUSG00000059089	Fcgr4	2	-1.67	-1.21	-1.48	0.81	1.04	1.33	0.85	0.46	1.19	0.33	0.3	-0.08	-0.99	-0.21	-0.69
ENSMUSG00000073902	Gm1966	2	-1.03	-1.4	-1.4	1.13	0.94	1.51	0.81	0.75	1.02	0.2	-0.06	-0.08	-1.19	-0.33	-0.87
ENSMUSG00000081665	Gm15922	2	-1.31	-1.35	-1.52	0.87	0.88	1.43	0.91	0.48	1.35	0.31	0.12	-0.25	-0.97	-0.22	-0.72
ENSMUSG00000032322	Pstpip1	2	-1.28	-1.58	-1.59	0.76	1.06	1.23	0.92	0.51	1.4	0.26	0.03	-0.1	-0.74	-0.26	-0.63
ENSMUSG00000041324	Inhba	2	-1.67	-1.35	-1.71	0.57	1.34	1.56	0.45	-0.04	0.78	0.82	0.07	0.03	-0.61	0	-0.26
ENSMUSG00000027737	Slc7a11	2	-1.64	-1.55	-1.56	0.89	1.07	1.48	0.43	0.32	0.85	0.7	0.28	-0.24	-0.22	-0.82	0.01
ENSMUSG00000052837	Junb	2	-1.46	-1.36	-1.34	0.89	1.39	1.79	0.32	0.09	0.9	0.55	0.1	-0.62	-0.36	-0.7	-0.21
ENSMUSG00000021250	Fos	2	-1.76	-1.18	-1.18	1.55	1.35	1.09	0.29	0.17	0.7	0.23	0.18	0.36	-0.03	-0.49	-1.27
ENSMUSG00000064246	Chil1	2	-1.33	-1.14	-1.34	0.28	0.48	1.45	1.04	1.06	1.45	0.25	0.35	-0.03	-0.49	-1.03	-0.99
ENSMUSG00000045349	Sh2d5	2	-1.36	-1.44	-1.46	0.67	0.76	1.45	0.86	0.76	1.06	0.54	0.29	0.2	-0.62	-0.59	-1.11
ENSMUSG00000017002	Slpi	2	-1.42	-1.34	-1.35	0.64	0.94	1.12	0.79	0.52	1.04	0.85	0.77	0.16	-0.79	-1.08	-0.85
ENSMUSG00000056054	S100a8	2	-1.15	-1.44	-1.63	0.61	0.81	1.13	0.84	0.68	1.12	0.81	0.62	0.12	-0.78	-1.05	-0.7
ENSMUSG00000050762	Prss27	2	-1.44	-1.8	-1.38	0.67	0.69	0.98	0.86	0.53	0.89	0.76	1.02	0.14	-0.47	-0.43	-1.02
ENSMUSG00000047798	Cd300lf	2	-1.36	-1.14	-1.05	0.78	1.13	1.35	0.67	0.54	1.06	0.86	0.33	-0.02	-1.02	-0.94	-1.19
ENSMUSG00000029379	Cxcl3	2	-1.21	-1.21	-1.21	0.65	1.12	1.32	0.66	0.55	1	0.8	0.57	0.15	-1.08	-0.91	-1.21
ENSMUSG00000018930	Ccl4	2	-1.28	-1.09	-1.28	0.6	1.12	1.34	0.62	0.58	0.88	0.82	0.66	0.25	-1.08	-1.05	-1.09
ENSMUSG00000027398	Il1b	2	-1.36	-1.26	-1.14	0.88	1.04	1.31	0.66	0.64	0.89	0.72	0.54	0.17	-1.07	-0.93	-1.09
ENSMUSG00000022126	Acod1	2	-1.19	-1.19	-1.05	0.86	0.92	1.24	0.75	0.69	1.04	0.78	0.5	0.11	-1.19	-1.19	-1.06
ENSMUSG00000058427	Cxcl2	2	-1.32	-1.17	-1.2	0.68	0.93	1.13	0.7	0.65	0.94	0.83	0.73	0.4	-1.21	-1.07	-1.02
ENSMUSG00000056071	S100a9	2	-1.08	-1.22	-1.38	0.7	0.93	1.16	0.78	0.67	1.08	0.76	0.61	0.2	-1.22	-0.9	-1.09
ENSMUSG00000000982	Ccl3	2	-1.06	-1.15	-1.45	0.52	1.09	1.27	0.6	0.54	0.88	0.87	0.74	0.37	-1.16	-0.95	-1.11
ENSMUSG00000024401	Tnf	2	-1.03	-1.32	-1.34	0.48	0.72	1.24	0.62	0.83	1.19	0.82	0.77	0.13	-1.03	-0.92	-1.19
ENSMUSG00000029304	Spp1	2	-1.21	-0.86	-1.03	0.54	0.93	1.28	0.76	0.46	1.04	0.66	0.67	0.47	-1.64	-0.85	-1.23
ENSMUSG00000003484	Cyp4f18	2	-1.07	-1.15	-1.43	0.73	1.1	1.39	0.63	0.51	1.06	0.81	0.52	-0.04	-1.1	-0.94	-1
ENSMUSG00000051439	Cd14	2	-1.09	-0.91	-1.39	0.85	1.07	1.51	0.57	0.53	1	0.72	0.48	-0.08	-1.23	-0.93	-1.08
ENSMUSG00000020077	Srgn	2	-1.11	-0.89	-1.45	0.71	0.96	1.53	0.62	0.47	1.1	0.8	0.53	-0.11	-1.17	-0.89	-1.1
ENSMUSG00000020120	Plek	2	-1.21	-1.16	-1.4	0.81	0.96	1.53	0.65	0.63	1.08	0.67	0.38	-0.17	-1.18	-0.63	-0.96
ENSMUSG00000025804	Ccr1	2	-1.2	-1.08	-1.46	0.72	0.96	1.43	0.68	0.55	1.06	0.8	0.5	-0.05	-1.17	-0.63	-1.11
ENSMUSG00000112023	Lilr4b	2	-0.98	-1.14	-1.66	0.82	1.13	1.46	0.64	0.49	1.1	0.65	0.28	-0.09	-1.11	-0.65	-0.92
ENSMUSG00000022876	Samsn1	2	-1.07	-1.15	-1.46	0.84	1.01	1.57	0.57	0.45	1.07	0.72	0.37	-0.07	-1.04	-0.69	-1.13
ENSMUSG00000026177	Slc11a1	2	-1.01	-1.09	-1.62	0.88	0.94	1.6	0.6	0.39	1.05	0.72	0.41	-0.1	-1.12	-0.61	-1.02
ENSMUSG00000079293	Clec7a	2	-1.16	-1.32	-1.55	0.85	1	1.57	0.49	0.28	0.86	0.86	0.57	0	-1.12	-0.6	-0.74
ENSMUSG00000028859	Csf3r	2	-1.08	-1.35	-1.51	1.03	0.84	1.22	0.71	0.56	1.18	0.8	0.31	-0.05	-1.16	-0.57	-0.93
ENSMUSG00000030144	Clec4d	2	-1.33	-1.35	-1.47	0.72	0.91	1.26	0.7	0.59	1.01	0.78	0.57	0.19	-1.18	-0.54	-0.87
ENSMUSG00000003541	Ier3	2	-1.47	-1.17	-1.26	0.58	1.47	1.4	0.48	0.35	1.03	0.82	0.46	-0.25	-0.74	-1.03	-0.67
ENSMUSG00000058755	Osm	2	-1.21	-1.01	-1.4	0.83	1.3	1.46	0.5	0.48	0.82	0.79	0.46	0.01	-1.04	-0.95	-1.05
ENSMUSG00000046223	Plaur	2	-1.3	-1.08	-1.53	0.84	1.22	1.62	0.5	0.44	0.83	0.71	0.34	-0.02	-0.87	-0.73	-0.98
ENSMUSG00000036931	Nfkbid	2	-1.39	-1.18	-1.41	0.75	1.07	1.49	0.63	0.54	1.04	0.78	0.42	-0.22	-0.93	-0.82	-0.78
ENSMUSG00000032487	Ptgs2	2	-1.25	-1.17	-1.43	0.92	1.07	1.46	0.56	0.53	0.94	0.77	0.42	-0.07	-0.67	-1.15	-0.93
ENSMUSG00000043939	A530064D06Rik	2	-1.25	-0.93	-1.16	1.14	1.33	1.83	0.42	0.3	0.92	0.36	-0.04	-0.17	-1.09	-0.87	-0.79
ENSMUSG00000022651	Retnlg	2	-1.22	-0.88	-1.06	0.8	1.29	1.45	0.64	0.49	1.23	0.44	0.3	-0.12	-1.06	-1.07	-1.22
ENSMUSG00000047810	Ccdc88b	2	-1.07	-0.87	-1.16	0.98	1.17	1.61	0.66	0.39	1.24	0.36	0.09	-0.22	-1.33	-0.89	-0.96
ENSMUSG00000026068	Il18rap	2	-0.82	-0.91	-1.36	0.77	1.23	1.78	0.62	0.59	1.13	0.35	-0.06	-0.22	-1.16	-0.89	-1.04
ENSMUSG00000027995	Tlr2	2	-1.11	-1.05	-1.46	0.89	1.13	1.49	0.67	0.53	1.24	0.5	0.23	-0.36	-1.03	-0.63	-1.06
ENSMUSG00000037731	Themis2	2	-1.02	-0.82	-1.52	1.09	1.03	1.54	0.69	0.56	1.03	0.47	0.23	-0.33	-1.36	-0.64	-0.94
ENSMUSG00000000204	Slfn4	2	-1.17	-0.97	-1.25	0.96	1.18	1.5	0.78	0.61	0.87	0.59	0.12	-0.11	-1.33	-0.67	-1.11
ENSMUSG00000026581	Sell	2	-1.19	-1	-1.38	1.05	0.98	1.41	0.65	0.5	1.16	0.65	0.3	-0.09	-1.13	-0.82	-1.07
ENSMUSG00000032691	Nlrp3	2	-1.21	-1.22	-1.32	1.01	1.12	1.46	0.58	0.54	0.95	0.71	0.33	-0.1	-1.06	-0.88	-0.92
ENSMUSG00000013974	Mcemp1	2	-1.25	-1.11	-1.2	0.91	1.09	1.5	0.67	0.49	1.15	0.63	0.29	-0.23	-1.16	-0.87	-0.91
ENSMUSG00000024737	Slc15a3	2	-1.15	-1.06	-1.43	0.95	1.06	1.66	0.47	0.43	0.99	0.82	0.25	-0.22	-1.02	-0.81	-0.93
ENSMUSG00000039232	Stx11	2	-1.09	-1.32	-1.24	0.93	1.16	1.75	0.45	0.32	1.04	0.71	0.22	-0.39	-0.84	-0.74	-0.95
ENSMUSG00000038067	Csf3	2	-1.05	-0.79	-1.32	1.21	1.17	1.27	0.74	0.04	0.85	0.74	0.38	0.23	-1.07	-1.32	-1.08
ENSMUSG00000084796	Mir142hg	2	-0.86	-1	-1.2	0.99	0.99	1.15	0.83	0.52	1.18	0.62	0.44	0.02	-1.4	-0.98	-1.3
ENSMUSG00000042265	Trem1	2	-0.97	-1.21	-1.21	1.04	1.16	1.48	0.61	0.56	0.96	0.62	0.29	-0.12	-1.05	-1.21	-0.95
ENSMUSG00000027360	Hdc	2	-0.95	-1	-1.15	0.93	1.12	1.47	0.6	0.53	0.94	0.77	0.39	-0.09	-1.27	-1.08	-1.22
ENSMUSG00000003153	Slc2a3	3	-1.01	-1.07	-0.98	0.84	1.16	1.54	0.45	0.39	1.01	0.87	0.45	-0.16	-1.24	-1.11	-1.14
ENSMUSG00000095042	Gm12537	3	-0.21	-0.51	-0.53	1.05	1.34	1.89	-0.93	-0.91	-0.81	-1.16	-0.87	-0.72	0.55	1.02	0.81
ENSMUSG00000080994	Gm13464	3	-0.38	-0.56	-0.87	1.1	1.51	1.88	-0.93	-0.71	-0.65	-0.86	-0.94	-0.79	0.51	0.94	0.75
ENSMUSG00000082424	Gm13292	3	-0.73	-0.74	-0.84	1.21	1.47	1.64	-0.61	-0.79	-0.75	-0.87	-0.77	-0.83	0.71	1	0.89
ENSMUSG00000110469	Gm10358	3	-0.52	-0.98	-0.61	1.17	1.51	1.79	-0.7	-0.64	-0.98	-0.73	-0.99	-0.61	0.59	0.95	0.75
ENSMUSG00000078592	Gm4609	3	-0.51	-0.85	-0.63	1.02	1.35	1.93	-0.66	-0.71	-0.72	-0.95	-1.02	-0.72	0.63	0.99	0.86
ENSMUSG00000079501	Gm5138	3	-0.5	-0.73	-0.58	1.19	1.47	1.68	-0.82	-0.64	-0.81	-0.96	-1.12	-0.67	0.64	1.02	0.83
ENSMUSG00000078967	Gm3272	3	-0.44	-0.72	-0.65	1.19	1.46	1.73	-0.76	-0.52	-0.81	-1.02	-1.26	-0.54	0.58	0.97	0.79
ENSMUSG00000079311	Gm3222	3	-0.39	-0.98	-0.6	1.17	1.58	1.83	-0.76	-0.55	-0.73	-1.07	-0.76	-0.81	0.52	0.91	0.63
ENSMUSG00000114759	Gm10257	3	-0.7	-0.84	-1.01	0.62	0.71	1.06	-0.65	-0.55	-0.25	-0.79	-0.69	-1.25	1.36	1.55	1.44
ENSMUSG00000095675	Ccl21b	3	-0.84	-0.9	-0.53	1.05	0.78	1.01	-0.87	-0.27	-0.65	-1.15	-0.87	-0.8	1.07	1.44	1.52
ENSMUSG00000095742	CAAA01147332.1	3	-0.79	-0.79	-0.79	1.2	1.1	1.09	-0.79	-0.79	-0.79	-0.79	-0.79	-0.79	1.24	1.18	1.28
ENSMUSG00000063897	CAAA01118383.1	3	-0.79	-0.79	-0.79	1.2	1.23	1.14	-0.79	-0.79	-0.79	-0.79	-0.79	-0.79	1.2	1.17	1.16
ENSMUSG00000095041	AC149090.1	3	-0.79	-0.79	-0.79	1.26	1.17	0.9	-0.79	-0.79	-0.79	-0.79	-0.79	-0.79	1.24	1.24	1.28
ENSMUSG00000095456	Il11ra2	3	-0.78	-0.78	-0.78	1.18	1.04	0.95	-0.78	-0.78	-0.78	-0.78	-0.78	-0.78	1.37	1.12	1.39
ENSMUSG00000095623	Il11ra2	3	-0.78	-0.78	-0.78	1.17	1.04	0.96	-0.78	-0.78	-0.78	-0.78	-0.78	-0.78	1.37	1.12	1.39
ENSMUSG00000093828	Ccl27	3	-0.79	-0.79	-0.79	1.33	1.11	1	-0.79	-0.79	-0.79	-0.79	-0.79	-0.79	1.03	1.19	1.41
ENSMUSG00000095247	Ccl27	3	-0.79	-0.79	-0.79	1.33	1.11	1	-0.79	-0.79	-0.79	-0.79	-0.79	-0.79	1.04	1.19	1.4
ENSMUSG00000072676	Tmem254a	3	-0.79	-0.91	-0.62	1.2	1.03	0.82	-0.94	-0.62	-0.68	-0.81	-0.79	-0.86	1.36	1.26	1.34
ENSMUSG00000060143	Gm10076	3	-0.7	-0.86	-0.99	1.04	1.23	1.19	-0.49	-0.62	-0.85	-0.85	-0.66	-0.99	1.13	1.37	1.06
ENSMUSG00000096842	Gm10736	3	-0.93	-0.75	-0.94	0.92	1.15	1.38	-0.46	-0.81	-0.86	-0.93	-0.4	-0.88	1.02	1.37	1.12
ENSMUSG00000066809	Gm10180	3	-0.81	-0.95	-0.8	0.99	1.19	1.29	-0.47	-0.82	-0.57	-0.98	-0.85	-0.76	0.99	1.36	1.19
ENSMUSG00000062611	Rps3a2	3	-1.01	-0.65	-0.83	1.2	1.2	1.26	-0.67	-0.78	-0.78	-0.85	-0.74	-0.76	1.15	1.17	1.09
ENSMUSG00000097141	Gm10524	3	-0.47	-0.61	-0.37	1.12	1.34	1.06	-0.96	-0.71	-1.21	-0.96	-1.04	-0.6	1.12	1.13	1.16
ENSMUSG00000105263	Gm42427	3	-0.25	-0.74	-0.43	1.07	0.91	1.21	-0.92	-0.96	-0.92	-1.11	-0.95	-0.63	1.29	1.24	1.19
ENSMUSG00000094259	Gm14536	3	-0.5	-0.79	-0.73	1.12	1.21	1.31	-0.74	-0.75	-0.72	-0.76	-1.22	-0.79	1.08	1.19	1.1
ENSMUSG00000061983	Rps12	3	-0.86	-1.36	-1.27	1.01	1.18	1.21	-0.29	-0.84	-0.56	-0.15	-0.82	-0.56	1.03	1.36	0.94
ENSMUSG00000044645	Gm7334	3	-0.84	-0.82	-1.19	1.13	0.59	0.7	-0.44	-0.82	-0.96	-0.51	-0.56	-0.58	1.57	1.09	1.65
ENSMUSG00000083364	Llph-ps2	3	-1.06	-0.87	-0.94	0.94	1.08	1.27	-0.43	-0.98	-0.58	-0.67	-0.8	-0.65	1.37	1.14	1.18
ENSMUSG00000059005	Hnrnpa3	3	-0.9	-0.67	-0.83	0.9	0.88	1.55	-0.74	-0.77	-0.68	-0.7	-0.8	-0.85	1.53	1.22	0.86
ENSMUSG00000048758	Rpl29	3	-0.83	-0.96	-1.08	0.89	0.9	1.33	-0.74	-0.51	-0.56	-0.63	-0.72	-0.92	1.44	1.15	1.24
ENSMUSG00000062647	Rpl7a	3	-1.17	-0.52	-0.78	0.93	1.01	1.36	-1	-0.66	-0.87	-0.59	-0.29	-1.02	1.32	1.14	1.13
ENSMUSG00000062846	Gm14176	3	-1.24	-0.97	-0.98	0.93	1.06	0.98	-0.76	-0.29	-0.38	-0.52	-0.73	-0.94	1.62	1.22	0.99
ENSMUSG00000084416	Rpl10a-ps1	3	-1.57	-0.75	-0.8	1	1.03	1.2	-0.5	-0.55	-0.76	-0.48	-0.59	-0.84	1.39	1.18	1.04
ENSMUSG00000026166	Ccl20	3	-1.02	-0.95	-1.38	1.65	2.26	1.29	-0.17	-0.32	-0.26	-0.17	-0.36	-0.52	-0.05	-0.02	0.02
ENSMUSG00000038418	Egr1	3	-1.75	-1.32	-1.25	1.03	1.46	1.81	-0.14	-0.23	0.01	-0.16	-0.42	-0.2	0.75	-0.08	0.51
ENSMUSG00000043889	Gm8399	3	-1.44	-1.21	-1.38	1.28	1.34	1.89	-0.11	-0.34	0.66	-0.33	-0.33	-0.75	0.39	0.09	0.24
ENSMUSG00000082016	Pgam1-ps2	3	-1.67	-1.47	-1.59	0.56	1.2	1.4	-0.07	0.1	0.59	0.06	-0.31	-0.9	0.74	0.87	0.5
ENSMUSG00000079003	Samd1	4	-0.81	-1	-0.65	-0.54	-0.44	-0.74	-0.21	-0.62	-0.16	-0.08	0.05	-0.29	2.12	1.98	1.39
ENSMUSG00000005220	Corin	4	-0.5	-0.41	-0.56	-0.46	-0.86	-0.51	-0.63	-0.74	-0.23	-0.02	-0.45	-0.26	1.97	2.18	1.47
ENSMUSG00000039137	Whrn	4	-0.61	-0.66	-0.48	-0.41	-0.4	-0.82	-0.66	-0.38	-1.1	0.12	-0.05	0.05	2.24	1.75	1.43
ENSMUSG00000042532	Golga7b	4	-0.17	-0.36	-0.61	-0.55	0.14	-0.79	-0.81	-0.74	-0.78	0.03	-0.36	-0.54	2.02	1.84	1.68
ENSMUSG00000048450	Msx1	4	-0.13	-0.47	-0.69	-0.4	-0.45	-0.72	-0.48	-0.53	-0.53	-0.5	-0.35	-0.38	2.36	1.93	1.33
ENSMUSG00000039385	Cdh6	4	-0.33	-0.35	-0.7	-0.35	-0.49	-1.01	-0.4	-0.79	-0.37	-0.37	-0.29	-0.14	2.29	1.61	1.7
ENSMUSG00000001510	Dlx3	4	-0.32	-0.6	-0.89	-0.19	-0.51	-1.04	-0.65	-0.55	-0.55	-0.03	-0.06	-0.12	2.21	1.6	1.71
ENSMUSG00000001655	Hoxc13	4	-0.45	-0.02	0.02	-0.1	-0.57	-0.66	-1	-0.82	-0.7	-0.07	-0.53	-0.56	2.12	1.44	1.91
ENSMUSG00000021469	Msx2	4	-0.22	0.07	-0.08	-0.19	-0.49	-0.54	-0.98	-0.85	-0.89	-0.31	-0.56	-0.47	2.19	1.56	1.75
ENSMUSG00000070990	Foxe1	4	-0.22	-0.43	-0.11	-0.38	-0.28	-0.53	-1.11	-0.65	-0.43	-0.43	-0.56	-0.48	2.15	1.58	1.88
ENSMUSG00000024600	Slc27a6	4	-0.98	-0.38	-0.52	-0.3	-0.3	-0.35	-0.45	-0.61	-0.29	-0.28	-0.54	-0.56	2.48	1.26	1.81
ENSMUSG00000001021	S100a3	4	-0.58	-0.61	-0.56	-0.27	-0.19	-0.16	-0.56	-0.47	-0.6	-0.68	-0.42	-0.58	2.15	1.49	2.03
ENSMUSG00000073413	Ly6g6d	4	-0.73	-0.62	-0.59	-0.25	-0.33	-0.51	-0.25	-0.38	-0.58	-0.58	-0.25	-0.55	2.09	1.26	2.26
ENSMUSG00000069805	Fbp1	4	-0.43	-0.38	-0.26	-0.2	-0.22	-0.44	-0.52	-0.33	-0.51	-1.01	-1.01	-0.29	2.11	1.63	1.86
ENSMUSG00000067614	Krt86	4	-0.98	-0.75	-0.57	-0.43	-0.19	0.15	-0.38	-0.45	-0.13	-0.37	-0.58	-0.7	1.93	1.06	2.4
ENSMUSG00000066975	Cryba4	4	-0.78	-0.81	-0.82	0.12	0.3	-0.11	-0.18	-0.2	-0.51	-0.87	-0.62	-0.77	2.04	1.07	2.14
ENSMUSG00000035831	Krt25	4	-0.48	-0.55	-0.47	-0.13	0.12	0.26	-0.78	-0.78	-0.78	-0.51	-0.6	-0.78	1.95	1.62	1.92
ENSMUSG00000051879	Krt71	4	-0.73	-0.45	-0.41	-0.03	0.05	0.18	-0.74	-0.71	-0.63	-0.63	-0.8	-0.61	1.95	1.59	1.97
ENSMUSG00000048013	Krt35	4	-0.61	-0.47	-0.4	-0.23	-0.27	-0.12	-0.91	-0.69	-0.62	-0.27	-0.49	-0.59	2.09	1.73	1.85
ENSMUSG00000063661	Krt73	4	-0.79	-0.56	-0.64	-0.28	-0.15	0.08	-0.79	-0.64	-0.79	-0.36	-0.29	-0.41	1.95	1.7	1.96
ENSMUSG00000055937	Krt28	4	-0.63	-0.57	-0.51	-0.19	-0.41	-0.03	-0.65	-0.53	-0.72	-0.43	-0.42	-0.59	1.95	1.63	2.1
ENSMUSG00000017588	Krt27	4	-0.7	-0.63	-0.48	-0.21	-0.12	0.14	-0.77	-0.64	-0.53	-0.46	-0.57	-0.61	1.94	1.53	2.12
ENSMUSG00000056270	Prr9	4	-0.53	-0.13	-0.35	-0.71	-0.54	-0.23	-0.6	-0.5	-0.48	-0.55	-0.18	-0.76	1.91	1.29	2.38
ENSMUSG00000047641	Krt87	4	-0.44	-0.36	-0.56	-0.58	-0.25	-0.04	-0.63	-0.57	-0.81	-0.52	-0.33	-0.5	2.03	1.3	2.27
ENSMUSG00000035592	Krt33a	4	-0.42	-0.44	-0.33	-0.3	-0.21	0.02	-0.86	-0.57	-0.86	-0.58	-0.39	-0.56	1.99	1.18	2.33
ENSMUSG00000048981	Krt31	4	-0.38	-0.44	-0.28	-0.38	-0.18	-0.3	-0.47	-0.67	-0.73	-0.67	-0.51	-0.59	2.09	1.23	2.27
ENSMUSG00000067596	Krt74	4	-0.4	-0.55	-0.52	-0.39	-0.45	-0.4	-0.77	-0.36	-0.77	-0.37	-0.35	-0.29	2.08	1.28	2.26
ENSMUSG00000052415	Tchh	4	-0.74	-0.58	-0.51	-0.49	-0.53	-0.19	-0.71	-0.57	-0.61	0.04	-0.19	-0.53	1.92	1.42	2.26
ENSMUSG00000024063	Lbh	4	-1.71	-1.46	-1.92	0.07	0.08	-0.26	0.6	0.16	0.81	0.51	0.13	-0.23	1.52	0.76	0.95
ENSMUSG00000036565	Ttyh3	4	-1.41	-1.47	-1.68	-0.2	-0.27	-0.63	0.13	-0.06	0.49	0.43	0.58	0.18	1.94	0.93	1.03
ENSMUSG00000025969	Nrp2	4	-1.52	-1.22	-1.67	-0.31	-0.49	-0.71	0.45	0.1	0.49	0.55	0.24	0.07	1.63	1.56	0.82
ENSMUSG00000062380	Tubb3	4	-1.5	-1.39	-1.46	-0.94	-0.84	-0.41	0.76	0.69	0.9	0.35	0.45	0.09	1.26	0.83	1.2
ENSMUSG00000026620	Mark1	4	-1.47	-1.39	-1.44	0.3	-0.07	-0.47	-0.67	-0.47	-0.25	0.66	0.64	0.71	1.35	0.9	1.68
ENSMUSG00000020875	Hoxb9	4	-1.91	-1.85	-1.01	0.28	0.23	-0.05	-0.54	-0.19	-0.22	0.75	0.42	0.43	1.36	0.99	1.29
ENSMUSG00000074796	Slc4a11	4	-1.58	-1.58	-1.05	0.03	-0.03	-0.04	-0.3	-0.32	-0.03	0.34	0.08	-0.16	2.02	1.43	1.19
ENSMUSG00000040624	Plekhg1	4	-0.88	-1	-1.34	-0.01	-0.44	-0.71	-0.33	-0.38	-0.5	0.35	0.25	0.03	2.37	1.47	1.13
ENSMUSG00000029816	Gpnmb	4	-1.05	-1.1	-1.38	-0.69	-0.85	-1.13	-0.08	-0.11	0.08	0.68	1.16	0.74	1.66	0.96	1.12
ENSMUSG00000032744	Heyl	4	-0.79	-1.23	-1.14	-1.21	-0.42	-0.4	0.03	-0.2	-0.46	0.2	0.44	0.31	2.08	1.41	1.37
ENSMUSG00000024409	Psors1c2	4	-0.78	-1.52	-1.28	-0.69	-0.25	-0.39	0	-0.09	-0.43	0.31	0.44	0.15	1.89	0.57	2.08
ENSMUSG00000025329	Padi1	4	-0.71	-0.68	-0.81	-1.02	-0.94	-0.96	-0.51	-0.15	-0.41	0.69	0.73	0.12	1.7	0.82	2.12
ENSMUSG00000037962	Rflna	4	-0.88	-0.52	-0.62	-0.64	-0.72	-0.73	-1.05	-0.65	-0.95	0.93	0.92	0.44	1.62	1.19	1.65
ENSMUSG00000076431	Sox4	4	-0.83	-0.32	-0.61	-0.65	-0.66	-1.29	-0.73	-0.72	-0.64	0.55	0.79	0.34	1.94	1.34	1.49
ENSMUSG00000027908	Tchhl1	4	-0.76	-0.55	-0.48	-0.34	-0.74	-0.49	-0.59	-0.44	-0.37	0.06	-0.18	-0.42	2.09	0.73	2.48
ENSMUSG00000101026	D730001G18Rik	4	-0.56	-0.45	-0.38	-0.35	-0.7	-0.87	-0.42	-0.5	-0.28	-0.18	-0.49	-0.4	2.15	1.23	2.22
ENSMUSG00000024232	Bambi	4	-0.48	-0.56	-0.5	-0.61	-0.49	-0.95	-0.51	-0.59	-0.44	-0.13	-0.18	-0.12	2.26	1.22	2.06
ENSMUSG00000078657	Crnn	4	-0.7	-0.61	-0.71	-0.46	-0.43	-0.38	-0.91	-0.72	-0.91	0.2	0.54	-0.12	1.9	1.19	2.13
ENSMUSG00000049598	Vsig8	4	-0.96	-0.79	-0.73	-0.72	-0.12	-0.32	-0.48	-0.79	-0.31	-0.12	0.13	-0.25	2.08	1.38	2
ENSMUSG00000025328	Padi3	4	-0.75	-0.87	-0.82	-0.38	-0.19	-0.43	-0.51	-0.57	-0.34	-0.1	-0.17	-0.48	1.98	1.48	2.14
ENSMUSG00000054083	Capn12	4	-0.91	-0.73	-1.02	-0.65	-0.65	-0.31	-0.24	-0.3	-0.17	0.16	0.08	-0.41	1.9	0.77	2.47
ENSMUSG00000011632	Pinlyp	4	-1.14	-1.02	-0.97	-0.58	-0.76	-0.32	0.04	-0.09	0.01	0.01	0.1	-0.28	1.85	0.79	2.36
ENSMUSG00000034317	Trim59	4	-1.39	-0.62	-0.74	-0.25	-0.8	-0.49	-0.13	0.03	0.03	-0.09	-0.34	-0.56	2.09	1.45	1.81
ENSMUSG00000028078	Dclk2	4	-1.15	-0.84	-1.06	-0.73	-0.99	-0.61	-0.04	-0.01	-0.18	0.39	-0.03	0.18	2.03	1.41	1.63
ENSMUSG00000031785	Adgrg1	4	-1.14	-1.05	-1.07	-0.38	-0.36	-0.65	-0.24	-0.23	-0.02	0.12	0.11	-0.25	2.28	1.09	1.78
ENSMUSG00000037434	Slc30a1	4	-0.74	-0.82	-1.05	-0.45	-0.83	-0.44	-0.32	0.03	-0.22	-0.21	-0.08	-0.19	2.52	1.23	1.58

## Sheet: S7
Table S7. Functional annotation analysis of differentially expressed genes identified from RNA sequencing (Figure 3C)*
Time	Annotation	Genes	-Log10 Padjust	Wound Regulation
D1	Calcium (KW-0106)	125	5.03	Upregulated
D1	Metalloprotease (KW-0482)	25	1.42	Upregulated
D3	Calcium (KW-0106)	194	18.07	Upregulated
D3	Metalloprotease (KW-0482)	39	4.72	Upregulated
D3	Oxidoreductase (KW-0560)	110	3.06	Upregulated
D7	Calcium (KW-0106)	170	20.15	Upregulated
D7	Metalloprotease (KW-0482)	36	5.77	Upregulated
D7	Oxidoreductase (KW-0560)	89	2.68	Upregulated
D7	Copper (KW-0186)	13	1.36	Upregulated
D14	Calcium (KW-0106)	147	5.42	Upregulated
D14	Metal-Binding (KW-0479)	486	5.08	Upregulated
D14	Zinc (KW-0862)	292	2.11	Upregulated
D14	Magnesium (KW-0460)	81	1.38	Upregulated
D1	Calcium (KW-0106)	56	2.19	Downregulated
D1	Calcium Signalling Pathway (mmu04020)	18	1.72	Downregulated
D3	Calcium (KW-0106)	92	2.7	Downregulated
D3	Calcium Signalling Pathway (mmu04020)	33	3.55	Downregulated
D3	Oxidoreductase (KW-0560)	100	9.7	Downregulated
D3	Metal-binding (KW-0479)	354	8.96	Downregulated
D3	Iron (KW-0408)	52	3.36	Downregulated
D3	Zinc (KW-0862)	192	1.6	Downregulated
D3	Manganese (KW-0464)	26	1.48	Downregulated
D3	Magnesium (KW-0460)	56	1.35	Downregulated
D7	Calcium Signalling Pathway (mmu04020)	28	2.66	Downregulated
D7	Oxidoreductase (KW-0560)	90	11.6	Downregulated
D7	Metal-binding (KW-0479)	261	3.96	Downregulated
D7	Iron (KW-0408)	49	5.04	Downregulated
D7	Manganese (KW-0464)	24	2.01	Downregulated
D7	Magnesium (KW-0460)	61	4.85	Downregulated
D14	Calcium Signalling Pathway (mmu04020)	40	3.42	Downregulated
D14	Oxidoreductase (KW-0560)	135	18.09	Downregulated
D14	Metal-binding (KW-0479)	408	7.57	Downregulated
D14	Iron (KW-0408)	72	7.28	Downregulated
D14	Manganese (KW-0464)	34	2.62	Downregulated
D14	Magnesium (KW-0460)	84	5.14	Downregulated
*KW = UniProt Knowledge Base Keyword. mmu = KEGG pathway. Differentially expressed gene cut-off of Log2 fold change = 0.58 and Benjamini-Hochberg adjusted P value < 0.05.

## Sheet: S8
Figure S8. Hierarchal clustering of wound-upregulated differentially expressed genes also present in the metal UniProt Knowledge Base (Supplementary Figure S4)*
Ensembl ID	Gene Symbol	Cluster	D0	D1	D3	D7	D14
ENSMUSG00000056481	Cd248	1	-1.17	-0.61	1.2	0.87	-0.29
ENSMUSG00000016918	Sulf1	1	-1.16	-0.55	1.24	0.83	-0.35
ENSMUSG00000000317	Bcl6b	1	-1.38	-0.28	1.06	0.9	-0.3
ENSMUSG00000031465	Angpt2	1	-1.32	-0.27	1.18	0.8	-0.38
ENSMUSG00000027204	Fbn1	1	-1.35	-0.32	1.15	0.81	-0.29
ENSMUSG00000043099	Hic1	1	-1.27	-0.14	0.94	1.06	-0.59
ENSMUSG00000001555	Fkbp10	1	-1.23	-0.33	0.97	1.09	-0.49
ENSMUSG00000028641	P3h1	1	-1.24	-0.28	1.04	1.02	-0.54
ENSMUSG00000024440	Pcdh12	1	-1.36	-0.21	0.93	1.04	-0.39
ENSMUSG00000023070	Rgn	1	-1.31	-0.23	0.98	1.03	-0.46
ENSMUSG00000078796	Zfp541	1	-1.25	-0.43	1.04	1.02	-0.38
ENSMUSG00000038074	Fkbp14	1	-1.15	-0.44	1.05	1.05	-0.51
ENSMUSG00000000753	Serpinf1	1	-1.15	-0.57	0.94	1.15	-0.37
ENSMUSG00000019539	Rcn3	1	-1.2	-0.48	0.96	1.12	-0.41
ENSMUSG00000034205	Loxl2	1	-1.22	-0.48	0.87	1.18	-0.34
ENSMUSG00000005973	Rcn1	1	-1.27	-0.46	0.91	1.12	-0.3
ENSMUSG00000036545	Adamts2	1	-1.51	-0.01	0.95	0.85	-0.28
ENSMUSG00000029161	Cgref1	1	-1.55	0.2	0.9	0.79	-0.34
ENSMUSG00000020388	Pdlim4	1	-1.55	-0.14	0.94	0.84	-0.08
ENSMUSG00000016382	Pls3	1	-1.48	-0.15	0.9	0.96	-0.22
ENSMUSG00000009772	Nuak2	1	-1.24	0.04	0.67	1.23	-0.7
ENSMUSG00000070719	Pla2g4d	1	-1.22	0.02	0.86	1.1	-0.75
ENSMUSG00000021803	Cdhr1	1	-1.05	0.26	0.83	1.01	-1.06
ENSMUSG00000029767	Calu	1	-1.23	0.15	1.2	0.65	-0.77
ENSMUSG00000000693	Loxl3	1	-1.27	0.01	1.23	0.68	-0.65
ENSMUSG00000025192	Entpd7	1	-1.22	0.1	1.04	0.89	-0.81
ENSMUSG00000002190	Clgn	1	-1.2	0.2	1.08	0.78	-0.87
ENSMUSG00000018168	Ikzf3	1	-1.12	-0.05	1.16	0.85	-0.83
ENSMUSG00000022220	Adcy4	1	-1.08	-0.07	1.06	0.96	-0.88
ENSMUSG00000020469	Myl7	1	-1	-0.2	0.99	1.09	-0.89
ENSMUSG00000053395	Cacng8	1	-1.11	-0.36	1.23	0.86	-0.62
ENSMUSG00000005397	Nid1	1	-1.04	-0.38	1.19	0.93	-0.7
ENSMUSG00000024235	Map3k8	1	-1.2	-0.19	1.24	0.78	-0.63
ENSMUSG00000025196	Cpn1	1	-1.14	-0.1	1.33	0.63	-0.73
ENSMUSG00000039529	Atp8b1	1	-1.15	-0.14	1.36	0.6	-0.67
ENSMUSG00000061928	Dsg1b	1	-0.84	-0.85	0.76	1.34	-0.41
ENSMUSG00000046318	Ccbe1	1	-0.91	-0.86	0.78	1.31	-0.32
ENSMUSG00000019230	Lhx9	1	-0.8	-0.8	0.82	1.33	-0.55
ENSMUSG00000002732	Fkbp7	1	-0.86	-0.77	1	1.17	-0.54
ENSMUSG00000033740	St18	1	-0.9	-0.68	0.92	1.24	-0.58
ENSMUSG00000021806	Nid2	1	-0.86	-0.8	1.16	1.01	-0.51
ENSMUSG00000064080	Fbln2	1	-1.15	-0.82	0.91	1.09	-0.03
ENSMUSG00000044254	Pcsk9	1	-1.18	-0.7	0.93	1.11	-0.15
ENSMUSG00000018593	Sparc	1	-1.17	-0.71	0.78	1.22	-0.12
ENSMUSG00000026042	Col5a2	1	-1.22	-0.62	0.76	1.23	-0.16
ENSMUSG00000033765	Calm4	1	-1.17	-0.48	0.72	1.31	-0.38
ENSMUSG00000020695	Mrc2	1	-1.14	-0.5	0.74	1.32	-0.42
ENSMUSG00000047497	Adamts12	1	-1.2	-0.52	0.71	1.31	-0.3
ENSMUSG00000031740	Mmp2	1	-1.23	-0.44	0.74	1.28	-0.35
ENSMUSG00000051242	Pcdhb9	1	-1.01	-0.71	0.46	1.49	-0.23
ENSMUSG00000046971	Pla2g4f	1	-0.84	-0.79	0.29	1.59	-0.25
ENSMUSG00000023931	Efhb	1	-0.83	-0.91	0.35	1.53	-0.13
ENSMUSG00000024304	Cdh2	1	-0.47	-1.19	0.59	1.38	-0.32
ENSMUSG00000035566	Pcdh17	1	-0.7	-1.06	0.56	1.43	-0.22
ENSMUSG00000066838	Zfp772	1	-0.97	-0.96	0.7	1.29	-0.06
ENSMUSG00000023191	P3h3	1	-0.99	-0.96	0.65	1.3	0
ENSMUSG00000032363	Adamts7	1	-0.97	-1.01	0.73	1.22	0.04
ENSMUSG00000036862	Dchs1	1	-1.03	-0.83	0.63	1.36	-0.12
ENSMUSG00000019817	Plagl1	1	-1.04	-0.91	0.58	1.33	0.04
ENSMUSG00000020186	Csrp2	1	-1.11	-0.84	0.72	1.24	-0.02
ENSMUSG00000073209	Klf14	1	-0.74	-0.2	0.72	1.31	-1.09
ENSMUSG00000050211	Pla2g4e	1	-0.37	-0.14	0.74	1.16	-1.4
ENSMUSG00000034755	Pcdh11x	1	-0.5	0.15	0.6	1.17	-1.42
ENSMUSG00000049100	Pcdh10	1	-0.6	-0.54	0.35	1.6	-0.82
ENSMUSG00000027684	Mecom	1	-0.59	-0.74	0.56	1.5	-0.73
ENSMUSG00000033268	Duox1	1	-0.42	-0.72	0.68	1.4	-0.94
ENSMUSG00000015468	Notch4	1	-0.4	-0.65	1.2	0.92	-1.07
ENSMUSG00000018906	P4ha2	1	-0.4	-0.77	1.16	0.98	-0.97
ENSMUSG00000029781	Fkbp9	1	-0.58	-0.72	1.06	1.12	-0.88
ENSMUSG00000020048	Hsp90b1	1	-1.3	0.13	1.49	-0.25	-0.07
ENSMUSG00000028755	Cda	1	-1.21	-0.43	1.53	0.05	0.06
ENSMUSG00000049439	Cyp20a1	1	-1.06	-0.38	1.51	0.44	-0.5
ENSMUSG00000020868	Xylt2	1	-1.34	-0.26	1.4	0.39	-0.19
ENSMUSG00000058498	Rnf207	1	-1.31	-0.45	1.34	0.51	-0.09
ENSMUSG00000026890	Lhx6	1	-1.27	-0.39	1.37	0.54	-0.25
ENSMUSG00000006360	Crip1	1	-1.37	0.18	1.37	0.24	-0.42
ENSMUSG00000005142	Man2b1	1	-1.45	-0.02	1.33	0.32	-0.19
ENSMUSG00000030538	Cib1	1	-1.5	0.11	1.28	0.25	-0.15
ENSMUSG00000021640	Naip1	1	-1.35	-0.05	1.34	0.47	-0.4
ENSMUSG00000056131	Pgm3	1	-1.42	-0.13	1.27	0.53	-0.25
ENSMUSG00000042213	Zfand4	1	-1.53	-0.35	1.06	0.62	0.19
ENSMUSG00000000730	Dnmt3l	1	-1.44	-0.42	1.17	0.63	0.06
ENSMUSG00000032374	Plod2	1	-1.5	-0.21	1.23	0.41	0.07
ENSMUSG00000021186	Fbln5	1	-1.34	-0.56	1.1	0.83	-0.03
ENSMUSG00000033520	Idi2	1	-1.41	-0.54	0.96	0.89	0.1
ENSMUSG00000001467	Cyp51	1	-1.32	-0.64	1.27	0.3	0.38
ENSMUSG00000029467	Atp2a2	1	-1.41	-0.52	1.21	0.34	0.39
ENSMUSG00000020520	Galnt10	1	-1.47	-0.52	1.04	0.61	0.33
ENSMUSG00000031604	Msmo1	1	-1.44	-0.52	1.14	0.51	0.31
ENSMUSG00000014303	Glis2	1	-1.35	-0.71	1.08	0.51	0.48
ENSMUSG00000024331	Dsc2	1	-1.01	-1.08	1.2	0.48	0.41
ENSMUSG00000021702	Thbs4	1	-0.36	-0.94	1.7	-0.15	-0.24
ENSMUSG00000021815	Mss51	1	-0.67	-0.84	1.63	0.23	-0.34
ENSMUSG00000031849	Comp	1	-0.65	-0.78	1.7	-0.02	-0.26
ENSMUSG00000091898	Tnnc1	1	-0.82	-1	1.24	0.85	-0.28
ENSMUSG00000029423	Piwil1	1	-0.85	-0.84	1.35	0.76	-0.41
ENSMUSG00000020681	Ace	1	-0.64	-0.87	1.45	0.63	-0.58
ENSMUSG00000034037	Fgd5	1	-0.67	-1.16	1.35	0.61	-0.13
ENSMUSG00000071553	Cpa2	1	-1	-0.98	0.94	1.07	-0.04
ENSMUSG00000006369	Fbln1	1	-1.11	-0.95	1.09	0.8	0.17
ENSMUSG00000040829	Zmynd15	1	-1.21	-0.69	1.09	0.92	-0.12
ENSMUSG00000039530	Tusc3	1	-1.03	-0.88	1.17	0.88	-0.14
ENSMUSG00000032452	Clstn2	1	-0.57	-1.34	0.77	1.13	0.01
ENSMUSG00000043943	Naalad2	1	-0.71	-1.29	0.87	1.03	0.11
ENSMUSG00000026418	Tnni1	1	-0.86	-1.23	0.97	0.86	0.26
ENSMUSG00000028047	Thbs3	1	-0.88	-1.2	0.93	0.94	0.21
ENSMUSG00000067219	Nipal1	1	-1.56	-0.3	0.16	0.92	0.79
ENSMUSG00000032373	Car12	1	-1.56	-0.35	0.28	0.97	0.66
ENSMUSG00000056155	Nanos3	1	-1.46	-0.5	0.21	1	0.75
ENSMUSG00000003555	Cyp17a1	1	-1.33	-0.67	0.17	1.09	0.74
ENSMUSG00000017400	Stac2	1	-1.4	-0.51	0.16	1.2	0.56
ENSMUSG00000001864	Aif1l	1	-1.31	-0.45	0.18	1.42	0.17
ENSMUSG00000030782	Tgfb1i1	1	-1.11	-0.69	0.09	1.49	0.22
ENSMUSG00000057706	Mex3b	1	-1.49	-0.17	0.03	1.27	0.36
ENSMUSG00000031673	Cdh11	1	-1.34	-0.42	-0.03	1.37	0.41
ENSMUSG00000039070	Cpa4	1	-1.3	-0.73	0.53	1.18	0.33
ENSMUSG00000022098	Bmp1	1	-1.19	-0.87	0.68	1.14	0.23
ENSMUSG00000018585	Atox1	1	-1.28	-0.78	0.69	1.1	0.27
ENSMUSG00000039062	Anpep	1	-1.26	-0.85	0.67	1.04	0.4
ENSMUSG00000008136	Fhl2	1	-1.23	-0.87	0.62	1.09	0.39
ENSMUSG00000033510	Otud7a	1	-0.99	-1.11	0.43	1.15	0.51
ENSMUSG00000020674	Pxdn	1	-1.13	-0.96	0.51	1.18	0.4
ENSMUSG00000009246	Trpm5	1	-0.93	-1.19	0.66	1.07	0.39
ENSMUSG00000027401	Tgm3	1	-1.36	-0.77	0.74	0.84	0.55
ENSMUSG00000071547	Nt5dc2	1	-1.45	-0.64	0.57	0.83	0.68
ENSMUSG00000038242	Aox4	1	-1.48	-0.59	0.77	0.77	0.52
ENSMUSG00000031659	Adcy7	1	-1.53	-0.48	0.78	0.81	0.41
ENSMUSG00000031372	Trex2	1	-1.61	-0.13	0.72	0.94	0.09
ENSMUSG00000042766	Trim46	1	-1.58	-0.23	0.62	1.02	0.17
ENSMUSG00000022468	Endou	1	-1.57	-0.22	0.71	0.98	0.11
ENSMUSG00000024598	Fbn2	1	-1.62	-0.02	0.45	1.08	0.1
ENSMUSG00000089953	Rnf224	1	-1.61	-0.15	0.3	1.06	0.4
ENSMUSG00000049723	Mmp12	1	-1.66	-0.16	0.48	0.89	0.45
ENSMUSG00000041774	Ydjc	1	-1.57	-0.39	0.51	0.9	0.55
ENSMUSG00000036596	Cpz	1	-1.46	-0.34	0.49	1.23	0.07
ENSMUSG00000021194	Chga	1	-1.47	-0.37	0.51	1.19	0.14
ENSMUSG00000001435	Col18a1	1	-1.49	-0.48	0.55	1.06	0.36
ENSMUSG00000054555	Adam12	1	-1.26	-0.63	0.44	1.34	0.1
ENSMUSG00000001506	Col1a1	1	-1.29	-0.62	0.64	1.25	0.01
ENSMUSG00000029061	Mmp23	1	-1.29	-0.55	0.7	1.23	-0.09
ENSMUSG00000044322	Dsc1	1	-1.39	-0.5	0.6	1.2	0.09
ENSMUSG00000029661	Col1a2	1	-1.34	-0.61	0.61	1.21	0.13
ENSMUSG00000028541	B4galt2	1	-1.5	-0.12	0.59	1.17	-0.15
ENSMUSG00000024430	Cabyr	1	-1.39	-0.28	0.69	1.21	-0.23
ENSMUSG00000041984	Rptn	1	-1.33	-0.59	0.79	1.11	0.02
ENSMUSG00000032997	Chpf	1	-1.4	-0.47	0.79	1.09	-0.01
ENSMUSG00000026043	Col3a1	1	-1.42	-0.38	0.82	1.08	-0.1
ENSMUSG00000036103	Colec12	1	-1.42	-0.32	0.86	1.06	-0.18
ENSMUSG00000029033	Acap3	1	-0.97	-0.53	-0.24	1.65	0.09
ENSMUSG00000004267	Eno2	1	-0.98	-0.56	-0.18	1.64	0.09
ENSMUSG00000061126	Cyp4f39	1	-0.99	-0.58	-0.21	1.62	0.16
ENSMUSG00000049538	Adamts16	1	-0.99	-0.58	0	1.64	-0.06
ENSMUSG00000046743	Fat4	1	-0.73	-0.7	-0.27	1.71	-0.01
ENSMUSG00000043857	Mgat5b	1	-1.11	-0.13	-0.27	1.63	-0.12
ENSMUSG00000032807	Alox12b	1	-0.93	-0.3	-0.09	1.7	-0.38
ENSMUSG00000022454	Nell2	1	-0.55	-0.17	-0.58	1.76	-0.46
ENSMUSG00000009654	Oit3	1	-0.59	-0.28	-0.27	1.76	-0.63
ENSMUSG00000063687	Pcdhb5	1	-1.06	-0.35	0.28	1.58	-0.44
ENSMUSG00000023885	Thbs2	1	-1.15	-0.42	0.43	1.48	-0.35
ENSMUSG00000037892	Pcdh18	1	-1.23	-0.26	0.26	1.51	-0.28
ENSMUSG00000045672	Col27a1	1	-0.85	-0.93	0.11	1.54	0.13
ENSMUSG00000021217	Tshz3	1	-0.69	-1.04	-0.07	1.54	0.25
ENSMUSG00000036036	Zfp57	1	-0.58	-1.16	0.18	1.51	0.06
ENSMUSG00000022887	Masp1	1	-0.82	-1.2	0.26	1.25	0.51
ENSMUSG00000053965	Pde5a	1	-0.63	-1.3	0.39	1.3	0.25
ENSMUSG00000021388	Aspn	1	-0.57	-1.29	0.16	1.38	0.32
ENSMUSG00000022321	Cdh10	1	-0.06	-1.28	0.22	1.48	-0.35
ENSMUSG00000067818	Myl9	1	-0.11	-1.31	-0.11	1.5	0.03
ENSMUSG00000044646	Zbtb7c	1	-0.42	-0.9	-0.49	1.66	0.15
ENSMUSG00000005947	Itgae	1	-0.45	-1.01	-0.34	1.62	0.19
ENSMUSG00000051331	Cacna1c	1	-0.49	-1.05	-0.3	1.58	0.26
ENSMUSG00000004929	Thop1	1	-1.04	-0.58	-0.52	1.21	0.93
ENSMUSG00000020866	Cacna1g	1	-0.8	-0.69	-0.69	1.25	0.93
ENSMUSG00000002771	Grin2d	1	-1.11	-0.44	-0.38	1.49	0.44
ENSMUSG00000066721	Zfp575	1	-1.17	-0.54	-0.19	1.46	0.44
ENSMUSG00000063130	Calml3	1	-1.05	-0.67	-0.29	1.42	0.58
ENSMUSG00000000901	Mmp11	1	-1.08	-0.56	-0.4	1.37	0.68
ENSMUSG00000034488	Edil3	1	-0.64	-0.6	-0.65	1.66	0.23
ENSMUSG00000022012	Enox1	1	-0.8	-0.29	-0.91	1.46	0.54
ENSMUSG00000015405	Ace2	1	-0.83	-1.1	-0.1	1.08	0.96
ENSMUSG00000006800	Sulf2	1	-0.94	-0.96	-0.18	0.93	1.14
ENSMUSG00000021464	Ror2	1	-0.97	-0.96	-0.11	0.9	1.14
ENSMUSG00000110404	Rnf223	1	-0.85	-0.92	-0.38	1.05	1.1
ENSMUSG00000042436	Mfap4	1	-1.14	-0.84	0.07	1.25	0.66
ENSMUSG00000102439	Flg	1	-1.19	-0.85	0.14	1.1	0.8
ENSMUSG00000051375	Pcdh1	1	-1.16	-0.8	-0.04	1.07	0.93
ENSMUSG00000028226	Mmp16	1	-0.63	-1.21	-0.09	1.32	0.62
ENSMUSG00000044807	Zfp354c	1	-0.87	-1.04	-0.11	1.24	0.78
ENSMUSG00000046404	Yod1	1	-0.87	-1.09	0.04	1.28	0.65
ENSMUSG00000026023	Cdk15	1	-0.65	-0.9	-0.54	1.42	0.67
ENSMUSG00000041000	Trim62	1	-0.73	-0.98	-0.33	1.41	0.63
ENSMUSG00000066415	Msl2	2	0.06	1.64	-0.61	-0.95	-0.14
ENSMUSG00000066440	Zfyve26	2	-0.51	1.68	-0.32	-0.9	0.05
ENSMUSG00000037942	Crp	2	-0.81	1.59	-0.1	-0.88	0.2
ENSMUSG00000025422	Agap2	2	-1.04	1.66	-0.13	-0.23	-0.25
ENSMUSG00000040943	Tet2	2	-1.29	1.48	0.07	-0.34	0.07
ENSMUSG00000042599	Kdm7a	2	-1.21	1.53	0.13	-0.42	-0.03
ENSMUSG00000018347	Zkscan6	2	-1.33	1.46	-0.17	0.22	-0.18
ENSMUSG00000018476	Kdm6b	2	-1.18	1.52	-0.45	-0.18	0.29
ENSMUSG00000023067	Cdkn1a	2	-1.13	1.59	-0.44	-0.05	0.03
ENSMUSG00000039220	Ppp1r10	2	-1.14	1.59	-0.41	0	-0.04
ENSMUSG00000063415	Cyp26b1	2	-0.98	1.57	-0.7	0.27	-0.16
ENSMUSG00000026826	Nr4a2	2	-0.68	1.75	-0.34	-0.14	-0.6
ENSMUSG00000030816	Rnf40	2	-0.77	1.73	-0.53	-0.37	-0.06
ENSMUSG00000032413	Rasa2	2	-1.07	1.49	-0.09	-0.7	0.37
ENSMUSG00000036432	Siah2	2	-1.11	1.48	0.09	-0.72	0.26
ENSMUSG00000027429	Sec23b	2	-1.4	1.13	0.01	-0.48	0.74
ENSMUSG00000023087	Noct	2	-1.33	1.25	0.24	-0.62	0.47
ENSMUSG00000037992	Rara	2	-1.61	1.11	0.23	-0.06	0.34
ENSMUSG00000026579	F5	2	-1.57	1.11	0.32	-0.23	0.38
ENSMUSG00000048911	Rnf24	2	-1.41	1.38	0.21	-0.26	0.08
ENSMUSG00000041193	Pla2g5	2	-1.39	1.33	0.18	-0.41	0.3
ENSMUSG00000010067	Rassf1	2	-1.47	1.26	0.29	-0.34	0.26
ENSMUSG00000038418	Egr1	2	-1.38	1.37	-0.12	-0.25	0.38
ENSMUSG00000054823	Nsd3	2	-1.27	1.34	-0.42	-0.25	0.59
ENSMUSG00000044339	Alkbh2	2	-1.3	1.26	-0.47	-0.19	0.69
ENSMUSG00000057637	Prdm2	2	-0.42	1.22	-0.96	-0.75	0.92
ENSMUSG00000079834	Tmlhe	2	-0.73	1.24	-0.73	-0.73	0.94
ENSMUSG00000078899	Gm4631	2	-0.61	0.92	-1.01	-0.52	1.22
ENSMUSG00000024807	Syvn1	2	-0.93	0.99	-0.83	-0.37	1.15
ENSMUSG00000094932	Gm2007	2	-0.36	0.86	-0.98	-0.77	1.25
ENSMUSG00000078880	Gm14308	2	-0.47	0.8	-0.82	-0.84	1.33
ENSMUSG00000028796	Phc2	2	-1.23	0.58	-0.37	-0.35	1.38
ENSMUSG00000002413	Braf	2	-1.11	0.48	-0.4	-0.45	1.48
ENSMUSG00000031303	Map3k15	2	-1.18	0.53	-0.18	-0.57	1.4
ENSMUSG00000033706	Smyd5	2	-1.18	0.77	-0.5	-0.36	1.27
ENSMUSG00000039841	Zfp800	2	-1.19	0.73	-0.39	-0.45	1.3
ENSMUSG00000037868	Egr2	2	-1.33	0.87	-0.59	-0.01	1.05
ENSMUSG00000031728	Zfp821	2	-0.96	0.58	-0.92	-0.08	1.37
ENSMUSG00000078878	Gm14305	2	-0.95	0.75	-0.53	-0.63	1.36
ENSMUSG00000078886	Gm2026	2	-1.05	0.79	-0.41	-0.64	1.31
ENSMUSG00000009630	Ppp2cb	2	-0.9	0.78	-0.3	-0.88	1.31
ENSMUSG00000078897	Gm4724	2	-0.87	0.74	-0.47	-0.77	1.37
ENSMUSG00000071369	Map3k5	2	-0.79	0.93	-0.17	-1.1	1.12
ENSMUSG00000024087	Cyp1b1	2	-1.11	0.44	1.1	-1.01	0.59
ENSMUSG00000028373	Astn2	2	-1.03	-0.19	1.49	-0.69	0.43
ENSMUSG00000016756	Cmah	2	-1.22	0.68	0.42	-0.9	1.03
ENSMUSG00000004113	Cacna1b	2	-1.2	0.37	0.55	-0.88	1.16
ENSMUSG00000033316	Galnt9	2	-1.1	0.44	0.48	-1	1.18
ENSMUSG00000031529	Tnks	2	-1.51	0.06	0.35	-0.15	1.25
ENSMUSG00000028613	Lrp8	2	-1.53	0.29	0.49	-0.35	1.1
ENSMUSG00000026669	Mcm10	2	-1.51	0.2	0.56	-0.36	1.12
ENSMUSG00000015890	Amdhd1	2	-1.57	0.2	0.45	-0.21	1.12
ENSMUSG00000014158	Trpv4	2	-1.46	0.37	0.41	-0.48	1.16
ENSMUSG00000060988	Galnt13	2	-1.48	0.45	0.55	-0.54	1.02
ENSMUSG00000035021	Baz1a	2	-1.57	0.31	0.2	-0.12	1.18
ENSMUSG00000025330	Padi4	2	-1.53	0.48	0.19	-0.29	1.15
ENSMUSG00000024177	Nme4	2	-1.65	0.31	0.23	0.04	1.07
ENSMUSG00000029110	Rnf4	2	-1.66	0.27	0.3	0.06	1.04
ENSMUSG00000048234	Rnf149	2	-1.74	0.46	0.47	0.09	0.72
ENSMUSG00000047434	Xxylt1	2	-1.74	0.56	0.34	0.09	0.74
ENSMUSG00000000673	Haao	2	-1.69	0.6	0.37	-0.07	0.79
ENSMUSG00000003814	Calr	2	-1.59	0.82	0.51	-0.37	0.63
ENSMUSG00000030407	Qpctl	2	-1.65	0.82	0.43	-0.22	0.62
ENSMUSG00000005667	Mthfd2	2	-1.61	0.85	0.62	-0.31	0.45
ENSMUSG00000074457	S100a16	2	-1.61	0.89	0.04	-0.09	0.77
ENSMUSG00000072872	Rybp	2	-1.56	1.01	-0.06	-0.13	0.73
ENSMUSG00000052713	Zfp608	2	-1.47	0.8	0.29	-0.53	0.91
ENSMUSG00000034342	Cbl	2	-1.45	0.72	0.09	-0.44	1.08
ENSMUSG00000023272	Creld2	2	-1.48	0.79	0.12	-0.42	0.99
ENSMUSG00000021494	Ddx41	2	-1.53	-0.32	0.44	0.28	1.13
ENSMUSG00000029171	Pgm1	2	-1.53	-0.22	0.5	0.08	1.17
ENSMUSG00000061414	Cracr2a	2	-1.56	-0.36	0.58	0.37	0.97
ENSMUSG00000025969	Nrp2	2	-1.4	-0.48	0.33	0.27	1.27
ENSMUSG00000036565	Ttyh3	2	-1.46	-0.35	0.18	0.38	1.25
ENSMUSG00000025817	Nudt5	2	-1.55	-0.11	0.79	-0.1	0.98
ENSMUSG00000028587	Orc1	2	-1.49	-0.19	0.79	-0.17	1.05
ENSMUSG00000020736	Nt5c	2	-1.72	0.17	0.7	0.16	0.7
ENSMUSG00000066150	Slc31a1	2	-1.67	-0.04	0.66	0.18	0.87
ENSMUSG00000033161	Atp1a1	2	-1.61	-0.06	0.64	0.02	1
ENSMUSG00000046352	Gjb2	2	-1.73	0.02	0.6	0.41	0.7
ENSMUSG00000021969	Zdhhc20	2	-1.72	0.03	0.43	0.49	0.78
ENSMUSG00000041991	Hrnr	2	-1.75	0.1	0.52	0.66	0.48
ENSMUSG00000027889	Ampd2	2	-1.76	0.49	0.15	0.65	0.46
ENSMUSG00000029913	Prdm5	2	-1.69	0.09	0.11	0.81	0.69
ENSMUSG00000038094	Atp13a4	2	-1.68	-0.03	0.26	0.59	0.87
ENSMUSG00000066829	Zfp810	2	-1.66	-0.04	0.15	0.66	0.89
ENSMUSG00000015112	Slc25a13	2	-1.67	-0.06	0.22	0.71	0.8
ENSMUSG00000031628	Casp3	2	-1.74	0.4	0.79	0.17	0.38
ENSMUSG00000031907	Zfp90	2	-1.75	0.45	0.68	0.12	0.5
ENSMUSG00000041308	Sntb2	2	-1.73	0.43	0.71	0.01	0.57
ENSMUSG00000015652	Steap1	2	-1.66	0.34	1.02	0.02	0.27
ENSMUSG00000043998	Mgat2	2	-1.7	0.32	0.95	0.11	0.32
ENSMUSG00000015653	Steap2	2	-1.69	-0.01	0.85	0.24	0.61
ENSMUSG00000006219	Fblim1	2	-1.71	0.05	0.87	0.39	0.41
ENSMUSG00000021608	Lpcat1	2	-1.64	-0.2	0.89	0.4	0.55
ENSMUSG00000037965	Zc3h7a	3	-1.77	0.46	0.62	0.47	0.22
ENSMUSG00000032507	Fbxl2	3	-1.77	0.46	0.55	0.58	0.18
ENSMUSG00000004677	Myo9b	3	-1.78	0.32	0.59	0.53	0.34
ENSMUSG00000048677	Tpcn2	3	-1.71	0.2	0.72	0.71	0.09
ENSMUSG00000054414	Slc30a7	3	-1.73	0.39	0.79	0.47	0.08
ENSMUSG00000051344	Plekhm3	3	-1.71	0.46	0.84	0.4	0.01
ENSMUSG00000037280	Galnt6	3	-1.73	0.41	0.71	0.58	0.02
ENSMUSG00000030530	Furin	3	-1.74	0.58	0.67	0.43	0.07
ENSMUSG00000038366	Lasp1	3	-1.72	0.56	0.78	0.32	0.06
ENSMUSG00000006403	Adamts4	3	-1.7	0.57	0.54	0.7	-0.11
ENSMUSG00000037601	Nme1	3	-1.63	0.35	1.08	0.25	-0.05
ENSMUSG00000079343	C1s2	3	-1.58	0.26	1.19	0.17	-0.05
ENSMUSG00000033453	Adamts15	3	-1.61	0.11	1.12	0.39	0
ENSMUSG00000024529	Lox	3	-1.55	0.25	1.1	0.49	-0.28
ENSMUSG00000034591	Slc41a2	3	-1.64	0.35	0.87	0.62	-0.19
ENSMUSG00000048440	Cyp4f16	3	-1.66	0.2	0.97	0.53	-0.04
ENSMUSG00000061731	Ext1	3	-1.63	0.24	1	0.52	-0.14
ENSMUSG00000043702	Pde12	3	-1.53	0.65	1.05	0.16	-0.33
ENSMUSG00000029674	Limk1	3	-1.54	0.57	1.09	0.16	-0.28
ENSMUSG00000042821	Snai1	3	-1.65	0.52	0.99	0.19	-0.04
ENSMUSG00000031799	Tpm4	3	-1.67	0.58	0.88	0.32	-0.11
ENSMUSG00000021196	Pfkp	3	-1.65	0.69	0.85	0.23	-0.11
ENSMUSG00000040699	Limd2	3	-1.5	0.74	0.91	0.34	-0.49
ENSMUSG00000027408	Cpxm1	3	-1.55	0.76	0.91	0.24	-0.36
ENSMUSG00000019979	Apaf1	3	-1.58	0.68	0.86	0.4	-0.36
ENSMUSG00000042677	Zc3h12a	3	-1.56	0.86	0.74	0.34	-0.39
ENSMUSG00000032870	Smap2	3	-1.5	0.75	0.8	0.49	-0.55
ENSMUSG00000052942	Glis3	3	-1.45	0.62	0.83	0.64	-0.65
ENSMUSG00000031443	F7	3	-1.52	0.5	0.88	0.64	-0.49
ENSMUSG00000009731	Kcnd1	3	-1.56	0.64	0.68	0.69	-0.46
ENSMUSG00000041926	Rnpep	3	-1.39	0.67	1.22	-0.34	-0.15
ENSMUSG00000020604	Arsg	3	-1.39	0.64	1.24	-0.23	-0.26
ENSMUSG00000024013	Fgd2	3	-1.36	0.69	1.23	-0.26	-0.3
ENSMUSG00000070605	Zfp992	3	-1.48	0.51	1.22	-0.2	-0.06
ENSMUSG00000039774	Galnt12	3	-1.41	0.41	1.33	-0.06	-0.27
ENSMUSG00000020790	Ankfy1	3	-1.52	0.76	1.04	-0.16	-0.13
ENSMUSG00000027994	Mcub	3	-1.5	0.78	1.04	-0.15	-0.17
ENSMUSG00000025185	Loxl4	3	-1.42	0.89	1.02	-0.11	-0.39
ENSMUSG00000042167	Papd4	3	-1.39	1.06	0.88	-0.22	-0.34
ENSMUSG00000003348	Mob3a	3	-1.68	0.68	0.84	0.08	0.07
ENSMUSG00000026749	Nek6	3	-1.66	0.76	0.79	0.15	-0.05
ENSMUSG00000028059	Arhgef2	3	-1.7	0.69	0.76	0.26	-0.02
ENSMUSG00000029860	Zyx	3	-1.65	0.91	0.67	0.05	0.01
ENSMUSG00000030697	Ppp4c	3	-1.67	0.88	0.59	-0.07	0.27
ENSMUSG00000032312	Csk	3	-1.74	0.8	0.49	0.16	0.29
ENSMUSG00000072889	Nfxl1	3	-1.54	0.84	0.9	-0.3	0.1
ENSMUSG00000036986	Pml	3	-1.49	0.99	0.81	-0.36	0.05
ENSMUSG00000000149	Gna12	3	-1.64	0.71	0.82	-0.19	0.3
ENSMUSG00000034664	Itga2b	3	-1.68	0.73	0.69	-0.14	0.4
ENSMUSG00000078995	Zfp456	3	-1.61	0.64	0.84	-0.32	0.44
ENSMUSG00000001025	S100a6	3	-1.63	0.69	0.93	-0.11	0.12
ENSMUSG00000029462	Vps29	3	-1.61	0.53	1.03	-0.14	0.19
ENSMUSG00000032116	Stt3a	3	-1.37	0.16	1.27	0.47	-0.53
ENSMUSG00000032440	Tgfbr2	3	-1.36	0.18	1.23	0.52	-0.58
ENSMUSG00000017697	Ada	3	-1.46	0.25	1.09	0.61	-0.48
ENSMUSG00000000555	Itga5	3	-1.42	0.23	1.1	0.65	-0.56
ENSMUSG00000027712	Anxa5	3	-1.35	0.41	0.99	0.69	-0.74
ENSMUSG00000036412	Arsi	3	-1.46	0.48	1.08	0.42	-0.52
ENSMUSG00000015340	Cybb	3	-1.46	0.42	1.11	0.45	-0.52
ENSMUSG00000030659	Nucb2	3	-1.36	0.48	1.15	0.4	-0.67
ENSMUSG00000024909	Efemp2	3	-1.35	0.4	1.18	0.44	-0.67
ENSMUSG00000050708	Ftl1	3	-1.08	0.47	1.12	0.53	-1.03
ENSMUSG00000015027	Galns	3	-1.11	0.37	1.14	0.59	-0.99
ENSMUSG00000020277	Pfkl	3	-0.95	0.41	1.33	0.27	-1.05
ENSMUSG00000003161	Sri	3	-1.05	0.25	1.35	0.37	-0.93
ENSMUSG00000021596	Mctp1	3	-1.11	0.47	1.3	0.23	-0.9
ENSMUSG00000035273	Hpse	3	-1.17	0.53	1.28	0.18	-0.82
ENSMUSG00000028041	Adam15	3	-1.22	0.45	1.24	0.33	-0.81
ENSMUSG00000032754	Slc8b1	3	-1.22	0.38	1.24	0.41	-0.81
ENSMUSG00000005413	Hmox1	3	-1.3	0.61	1.15	0.27	-0.73
ENSMUSG00000006519	Cyba	3	-1.31	0.55	1.13	0.38	-0.76
ENSMUSG00000063524	Eno1	3	-1.26	0.51	1.19	0.35	-0.78
ENSMUSG00000025355	Mmp19	3	-1.31	0.55	1.17	0.31	-0.72
ENSMUSG00000059883	Irak4	3	-1.28	0.52	1.2	0.31	-0.75
ENSMUSG00000026509	Capn2	3	-1.07	0.72	1.28	-0.1	-0.83
ENSMUSG00000102918	Pcdhgc3	3	-0.97	0.6	1.39	-0.14	-0.87
ENSMUSG00000004730	Adgre1	3	-1.18	0.61	1.27	0.07	-0.77
ENSMUSG00000020227	Irak3	3	-1.2	0.78	1.19	-0.03	-0.74
ENSMUSG00000021322	Aoah	3	-1.27	0.66	1.28	-0.12	-0.55
ENSMUSG00000056124	B4galt6	3	-1.34	0.7	1.23	-0.13	-0.45
ENSMUSG00000015968	Cacna1d	3	-1.39	0.7	1.16	0.03	-0.49
ENSMUSG00000048387	Osr1	3	-1.33	0.71	1.18	0.03	-0.58
ENSMUSG00000057789	Bak1	3	-1.38	0.82	1.02	0.14	-0.6
ENSMUSG00000001131	Timp1	3	-1.3	0.82	1.07	0.11	-0.69
ENSMUSG00000028558	Calr4	3	-1.34	0.9	0.96	0.16	-0.67
ENSMUSG00000039981	Zc3h12d	3	-1.3	0.94	0.99	0.04	-0.66
ENSMUSG00000039519	Cyp7b1	3	-1.17	0.97	1.03	-0.04	-0.8
ENSMUSG00000030148	Clec4a2	3	-1.29	0.87	1.09	-0.03	-0.64
ENSMUSG00000032562	Gnai2	3	-1.27	0.9	1.07	-0.04	-0.65
ENSMUSG00000024696	Lpxn	3	-1.25	0.88	0.94	0.27	-0.84
ENSMUSG00000032369	Plscr1	3	-1.27	0.89	0.89	0.31	-0.82
ENSMUSG00000031444	F10	3	-1.35	0.87	0.88	0.33	-0.73
ENSMUSG00000023349	Clec4n	3	-1.29	0.86	0.97	0.24	-0.78
ENSMUSG00000031142	Cacna1f	3	-1.35	0.83	0.95	0.27	-0.71
ENSMUSG00000071203	Naip5	3	-1.15	0.84	1.05	0.18	-0.92
ENSMUSG00000078945	Naip2	3	-1.21	0.79	1.1	0.16	-0.83
ENSMUSG00000024397	Aif1	3	-1.19	0.78	1.09	0.19	-0.87
ENSMUSG00000037465	Klf10	3	-1.39	1.02	0.76	0.24	-0.63
ENSMUSG00000033721	Vav3	3	-1.41	1.06	0.75	0.16	-0.55
ENSMUSG00000071379	Hpcal1	3	-1.38	1.08	0.83	-0.03	-0.51
ENSMUSG00000024851	Pitpnm1	3	-1.44	0.96	0.87	0.11	-0.49
ENSMUSG00000056537	Rlim	3	-1.39	1	0.86	0.08	-0.56
ENSMUSG00000040613	Apobec1	3	-1.46	0.87	0.94	0.12	-0.47
ENSMUSG00000032812	Arap1	3	-1.46	0.82	1	0.07	-0.44
ENSMUSG00000027849	Syt6	3	-1.28	0.55	-0.84	1.01	0.56
ENSMUSG00000102543	Pcdhgc5	3	-1.26	1.08	-0.37	0.97	-0.42
ENSMUSG00000031549	Ido2	3	-1.21	0.46	0.03	1.38	-0.65
ENSMUSG00000035390	Brsk1	3	-1.41	0.54	-0.3	1.27	-0.1
ENSMUSG00000028194	Ddah1	3	-1.54	0.42	0.54	0.99	-0.42
ENSMUSG00000011256	Adam19	3	-1.56	0.31	0.38	1.13	-0.26
ENSMUSG00000000957	Mmp14	3	-1.45	0.03	0.19	1.36	-0.13
ENSMUSG00000047910	Pcdhb16	3	-1.63	0.22	0.15	1.11	0.15
ENSMUSG00000037400	Atp11b	3	-1.33	0.61	0.78	0.76	-0.81
ENSMUSG00000025041	Nt5c2	3	-1.33	0.69	0.61	0.85	-0.82
ENSMUSG00000047562	Mmp10	3	-1.29	0.84	0.59	0.74	-0.87
ENSMUSG00000072623	Zfp9	3	-1.18	0.84	0.31	0.97	-0.93
ENSMUSG00000027907	S100a11	3	-1.14	1.05	0.36	0.71	-0.98
ENSMUSG00000050578	Mmp13	3	-1.23	1.01	0.53	0.6	-0.91
ENSMUSG00000030789	Itgax	3	-1.42	0.85	0.28	0.9	-0.61
ENSMUSG00000020642	Rnf144a	3	-1.43	0.72	0.31	1	-0.59
ENSMUSG00000039982	Dtx4	3	-1.38	0.74	0.3	1.01	-0.67
ENSMUSG00000024014	Pim1	3	-1.44	1.21	0.23	0.45	-0.45
ENSMUSG00000029552	Tes	3	-1.34	1.26	0.32	0.37	-0.61
ENSMUSG00000036699	Zcchc12	3	-1.48	1.21	0.03	0.51	-0.27
ENSMUSG00000021125	Arg2	3	-1.56	1.21	0.32	0.1	-0.07
ENSMUSG00000027951	Adar	3	-1.62	0.95	0.48	0.44	-0.25
ENSMUSG00000028793	Rnf19b	3	-1.54	1.12	0.5	0.21	-0.28
ENSMUSG00000022218	Tgm1	3	-1.72	0.86	0.25	0.47	0.14
ENSMUSG00000035671	Zswim4	3	-1.61	1.14	0.09	0.3	0.08
ENSMUSG00000008438	Adam21	3	-1.57	1.18	0.01	0.36	0.01
ENSMUSG00000020715	Ern1	3	-1.66	1.03	0.12	0.38	0.14
ENSMUSG00000035248	Zcchc6	3	-1.3	1.35	0.52	-0.09	-0.48
ENSMUSG00000036246	Gmip	3	-1.24	1.42	0.42	-0.09	-0.5
ENSMUSG00000050468	Astl	3	-1.15	1.39	0.58	-0.21	-0.6
ENSMUSG00000037580	Gch1	3	-1.31	1.24	0.67	-0.07	-0.54
ENSMUSG00000035891	Cerk	3	-1.34	1.25	0.61	-0.02	-0.5
ENSMUSG00000040152	Thbs1	3	-1.33	1.32	0.48	0.03	-0.5
ENSMUSG00000028341	Nr4a3	3	-1.36	1.27	0.5	0.11	-0.53
ENSMUSG00000023903	Mmp25	3	-1.36	1.25	0.54	0.09	-0.52
ENSMUSG00000053581	Zfand2a	3	-1.11	1.48	0.33	0	-0.7
ENSMUSG00000029826	Zc3hav1	3	-1.14	1.49	0.25	0.03	-0.64
ENSMUSG00000050370	Ch25h	3	-1.1	1.46	0.24	0.16	-0.76
ENSMUSG00000044786	Zfp36	3	-1.04	1.41	0.42	0.08	-0.87
ENSMUSG00000059866	Tnip2	3	-1.09	1.43	0.37	0.09	-0.8
ENSMUSG00000090881	Gm6904	3	-0.99	1.45	0.34	0.08	-0.88
ENSMUSG00000022500	Litaf	3	-1.1	1.31	0.63	0	-0.82
ENSMUSG00000024776	Stambpl1	3	-1.12	1.27	0.7	-0.04	-0.8
ENSMUSG00000030830	Itgal	3	-1.24	1.3	0.56	0.05	-0.68
ENSMUSG00000023036	Pcdhgc4	3	-1.16	1.38	0.42	0.11	-0.75
ENSMUSG00000042726	Trafd1	3	-0.87	1.57	0.28	-0.15	-0.83
ENSMUSG00000039236	Isg20	3	-0.78	1.57	0.29	-0.2	-0.89
ENSMUSG00000027580	Helz2	3	-0.93	1.6	0.2	-0.16	-0.71
ENSMUSG00000043089	Mmp1a	3	-0.81	1.56	0.44	-0.6	-0.6
ENSMUSG00000029217	Tec	3	-0.87	1.42	0.33	0.18	-1.05
ENSMUSG00000048827	Pkd1l3	3	-0.79	1.41	0.23	0.26	-1.12
ENSMUSG00000000078	Klf6	3	-0.83	1.4	0.44	0.05	-1.07
ENSMUSG00000020641	Rsad2	3	-0.79	1.39	0.43	0.08	-1.11
ENSMUSG00000091649	Phf11b	3	-0.88	1.32	0.61	-0.01	-1.05
ENSMUSG00000026222	Sp100	3	-0.91	1.24	0.66	0.11	-1.09
ENSMUSG00000070327	Rnf213	3	-0.88	1.25	0.59	0.18	-1.13
ENSMUSG00000017830	Dhx58	3	-1.01	1.3	0.62	0.03	-0.95
ENSMUSG00000032661	Oas3	3	-0.97	1.29	0.6	0.09	-1.01
ENSMUSG00000035208	Slfn8	3	-0.97	1.26	0.63	0.1	-1.02
ENSMUSG00000070031	Sp140	3	-1.02	1.21	0.67	0.16	-1.02
ENSMUSG00000024150	Mcfd2	3	-1	0.99	1.02	-0.02	-1
ENSMUSG00000031264	Btk	3	-1	0.98	1.02	0	-1
ENSMUSG00000032698	Lmo2	3	-1.1	1.01	0.96	0.06	-0.92
ENSMUSG00000047686	Rtl3	3	-1.03	1.01	0.98	0.01	-0.98
ENSMUSG00000035697	Arhgap45	3	-1.05	1.01	0.97	0.04	-0.96
ENSMUSG00000021998	Lcp1	3	-1.16	0.99	0.87	0.23	-0.93
ENSMUSG00000029925	Tbxas1	3	-1.12	0.93	0.98	0.15	-0.94
ENSMUSG00000022534	Mefv	3	-1.17	0.95	0.94	0.18	-0.91
ENSMUSG00000048385	Scrt1	3	-1.04	0.94	0.97	0.17	-1.04
ENSMUSG00000043613	Mmp3	3	-1.29	1.07	0.82	0.12	-0.72
ENSMUSG00000026872	Zeb2	3	-1.2	1.12	0.88	-0.06	-0.74
ENSMUSG00000060131	Atp8b4	3	-1.1	1.08	0.86	0.1	-0.94
ENSMUSG00000009292	Trpm2	3	-1.09	1.13	0.83	0.05	-0.92
ENSMUSG00000037418	Best1	3	-1.09	1.19	0.71	0.13	-0.94
ENSMUSG00000051341	Zfp52	3	-1.14	1.16	0.74	0.12	-0.89
ENSMUSG00000031881	Cdh16	3	-1.13	1.14	0.71	0.21	-0.94
ENSMUSG00000026581	Sell	3	-1.13	1.09	0.73	0.27	-0.96
ENSMUSG00000018507	Trpv2	3	-1.18	1.11	0.76	0.19	-0.88
ENSMUSG00000034640	Tiparp	3	-0.86	1.14	0.74	0.16	-1.18
ENSMUSG00000032066	Bco2	3	-0.84	1.04	0.87	0.13	-1.2
ENSMUSG00000057596	Trim30d	3	-0.98	1.12	0.79	0.13	-1.07
ENSMUSG00000000530	Acvrl1	3	-0.94	1.1	0.79	0.18	-1.13
ENSMUSG00000030921	Trim30a	3	-0.94	1.12	0.85	0.04	-1.06
ENSMUSG00000005800	Mmp8	3	-1.04	0.94	0.88	0.3	-1.08
ENSMUSG00000040061	Plcb2	3	-0.97	1.01	0.85	0.24	-1.13
ENSMUSG00000052776	Oas1a	3	-1.01	1.06	0.8	0.23	-1.08
ENSMUSG00000029561	Oasl2	3	-0.92	1.1	0.67	0.34	-1.18
ENSMUSG00000050022	Amz1	3	-0.88	1.18	0.6	0.27	-1.18
ENSMUSG00000000275	Trim25	3	-0.92	1.18	0.65	0.23	-1.14
ENSMUSG00000034330	Plcg2	3	-1.17	0.92	0.86	0.34	-0.96
ENSMUSG00000037946	Fgd3	3	-1.18	0.82	0.91	0.41	-0.97
ENSMUSG00000030142	Clec4e	3	-1.17	0.87	0.8	0.5	-1
ENSMUSG00000056071	S100a9	3	-1.16	0.88	0.79	0.49	-1.01
ENSMUSG00000030144	Clec4d	3	-1.31	0.91	0.73	0.49	-0.82
ENSMUSG00000056054	S100a8	3	-1.33	0.81	0.84	0.49	-0.8
ENSMUSG00000025473	Adam8	3	-1.06	1.15	0.61	0.34	-1.04
ENSMUSG00000048120	Entpd1	3	-1.13	1.09	0.67	0.36	-0.99
ENSMUSG00000003484	Cyp4f18	3	-1.16	1.02	0.7	0.41	-0.97
ENSMUSG00000040627	Aicda	3	-1.2	1.13	0.68	0.26	-0.87
ENSMUSG00000026177	Slc11a1	3	-1.2	1.11	0.66	0.33	-0.89
ENSMUSG00000032487	Ptgs2	3	-1.22	1.1	0.65	0.35	-0.87
ENSMUSG00000001588	Acap1	3	-1.04	1.35	0.29	0.35	-0.95
ENSMUSG00000037159	Wee2	3	-1.2	1.19	0.46	0.41	-0.87
ENSMUSG00000040296	Ddx58	3	-1.13	1.24	0.54	0.26	-0.91
ENSMUSG00000024661	Fth1	3	-0.15	0.73	0.78	0.29	-1.65
ENSMUSG00000037005	Xpnpep2	3	-0.35	1.07	0.87	-0.19	-1.39
ENSMUSG00000026896	Ifih1	3	-0.38	1.27	0.57	-0.08	-1.39
ENSMUSG00000038507	Parp12	3	-0.82	0.77	0.93	0.41	-1.3
ENSMUSG00000019987	Arg1	3	-0.85	0.76	0.94	0.43	-1.28
ENSMUSG00000062382	Ftl1-ps1	3	-0.92	0.64	0.96	0.55	-1.23
ENSMUSG00000040907	Atp1a3	3	-0.59	0.95	0.78	0.28	-1.43
ENSMUSG00000047180	Neurl3	3	-0.73	0.92	0.85	0.3	-1.34
ENSMUSG00000068245	Phf11d	3	-0.86	1.02	0.64	0.46	-1.26
ENSMUSG00000017737	Mmp9	3	-0.73	0.91	0.63	0.58	-1.38
ENSMUSG00000040483	Xaf1	3	-0.68	1.16	0.31	0.55	-1.34
ENSMUSG00000034116	Vav1	3	-1.13	0.75	1.05	0.31	-0.99
ENSMUSG00000033949	Trim36	3	-1.06	0.58	1.18	0.32	-1.02
ENSMUSG00000020826	Nos2	3	-0.9	0.71	1.16	0.19	-1.15
ENSMUSG00000009585	Apobec3	3	-0.92	0.58	1.22	0.25	-1.13
ENSMUSG00000018654	Ikzf1	3	-0.91	0.85	1.07	0.13	-1.14
ENSMUSG00000025810	Nrp1	3	-0.84	0.78	1.14	0.1	-1.18
ENSMUSG00000017929	B4galt5	3	-0.85	0.85	1.09	0.07	-1.17
ENSMUSG00000052310	Slc39a1	3	-0.96	0.87	1.09	0.06	-1.07
ENSMUSG00000027639	Samhd1	3	-0.99	0.86	1.1	0.07	-1.04
ENSMUSG00000078942	Naip6	3	-1.02	0.89	1.05	0.12	-1.03
ENSMUSG00000020709	Adap2	3	-1.02	0.76	1.13	0.17	-1.04
ENSMUSG00000036469	Marchf1	3	-1.01	0.89	1.13	-0.07	-0.94
ENSMUSG00000014547	Wdfy2	3	-0.89	0.86	1.14	-0.03	-1.08
ENSMUSG00000021866	Anxa11	3	-0.03	1.55	0.14	-0.48	-1.17
ENSMUSG00000025340	Rabgef1	3	-0.18	1.62	-0.07	-0.24	-1.13
ENSMUSG00000027983	Cyp2u1	3	-0.21	1.35	0.21	0.1	-1.44
ENSMUSG00000057143	Trim12c	3	-0.21	1.46	0.4	-0.43	-1.22
ENSMUSG00000060441	Trim5	3	-0.33	1.38	0.47	-0.2	-1.31
ENSMUSG00000066258	Trim12a	3	-0.24	1.45	0.32	-0.24	-1.3
ENSMUSG00000058624	Gda	3	-0.83	1.07	1.09	-0.43	-0.9
ENSMUSG00000078616	Trim30c	3	-0.6	1	1.12	-0.43	-1.1
ENSMUSG00000023031	Cela1	3	-0.9	0.89	1.2	-0.22	-0.96
ENSMUSG00000078502	Gm13212	3	-0.91	0.84	1.25	-0.28	-0.91
ENSMUSG00000020376	Rnf130	3	-0.48	0.78	1.3	-0.51	-1.09
ENSMUSG00000040855	Reps2	3	-0.54	0.79	1.33	-0.61	-0.98
ENSMUSG00000023473	Celsr3	3	-0.43	1.24	0.83	-0.48	-1.16
ENSMUSG00000031760	Mt3	3	-0.38	1.09	1.01	-0.54	-1.17
ENSMUSG00000003617	Cp	3	-0.27	1.02	1.08	-0.74	-1.09
ENSMUSG00000025701	Alox5	3	-0.4	1.24	0.9	-0.82	-0.91
ENSMUSG00000026938	Fcna	3	-0.03	0.75	1.22	-0.78	-1.15
ENSMUSG00000000805	Car4	3	-0.2	0.78	1.14	-0.32	-1.4
ENSMUSG00000006611	Hfe	3	-0.17	0.71	1.22	-0.41	-1.35
ENSMUSG00000072941	Sod3	3	-0.21	0.61	1.32	-0.43	-1.29
ENSMUSG00000022861	Dgkg	3	-0.68	1.46	0.57	-0.4	-0.95
ENSMUSG00000032690	Oas2	3	-0.77	1.33	0.77	-0.41	-0.93
ENSMUSG00000041620	Mmp1b	3	-0.73	1.3	0.84	-0.53	-0.89
ENSMUSG00000039853	Trim14	3	-0.64	1.3	0.73	-0.23	-1.16
ENSMUSG00000044703	Phf11a	3	-0.96	1.35	0.75	-0.4	-0.74
ENSMUSG00000011008	Mcoln2	3	-1.05	1.26	0.84	-0.37	-0.68
ENSMUSG00000024772	Ehd1	3	-1.01	1.29	0.83	-0.46	-0.64
ENSMUSG00000052749	Trim30b	3	-0.96	1.25	0.76	-0.1	-0.96
ENSMUSG00000052889	Prkcb	3	-0.86	1.18	0.93	-0.28	-0.96
ENSMUSG00000066800	Rnasel	3	-1	1.14	0.94	-0.19	-0.89
ENSMUSG00000029484	Anxa3	3	-0.78	1	1.04	-0.11	-1.15
ENSMUSG00000032000	Birc3	3	-0.75	1.08	1	-0.21	-1.11
ENSMUSG00000026822	Lcn2	3	-0.87	1.06	0.95	-0.05	-1.09
ENSMUSG00000027293	Ehd4	3	-0.89	1.07	0.98	-0.11	-1.04
ENSMUSG00000001999	Blvra	3	-1.05	0.41	1.51	-0.25	-0.62
ENSMUSG00000026829	Gbgt1	3	-1.09	0.48	1.48	-0.43	-0.44
ENSMUSG00000026580	Selp	3	-1.18	0.32	1.51	-0.27	-0.38
ENSMUSG00000029608	Rph3a	3	-0.73	0.06	1.69	-0.33	-0.7
ENSMUSG00000030895	Hpx	3	-1	0.12	1.64	-0.37	-0.38
ENSMUSG00000028463	Car9	3	-1.06	0.42	1.5	-0.64	-0.22
ENSMUSG00000079484	Phyhd1	3	-0.84	0.08	1.62	-0.81	-0.05
ENSMUSG00000065987	Cd209b	3	-0.48	0.68	1.38	-1.06	-0.53
ENSMUSG00000031495	Cd209d	3	-0.51	0.48	1.53	-0.87	-0.64
ENSMUSG00000026532	Spta1	3	0	0.2	1.55	-0.94	-0.81
ENSMUSG00000039753	Fbxl5	3	-1.21	0.81	1.21	-0.6	-0.21
ENSMUSG00000026648	Dclre1c	3	-1.31	0.9	1.11	-0.39	-0.31
ENSMUSG00000023068	Nus1	3	-1.09	1.03	1.1	-0.49	-0.55
ENSMUSG00000067916	Zfp991	3	-1.14	1.13	0.98	-0.59	-0.38
ENSMUSG00000033107	Rnf125	3	-1.12	0.94	1.16	-0.32	-0.65
ENSMUSG00000024644	Cndp2	3	-1.22	0.85	1.19	-0.25	-0.56
ENSMUSG00000031494	Cd209a	3	-0.92	0.73	1.38	-0.48	-0.7
ENSMUSG00000028369	Svep1	3	-0.96	0.69	1.4	-0.53	-0.6
ENSMUSG00000026712	Mrc1	3	-1.01	0.87	1.26	-0.53	-0.59
ENSMUSG00000039109	F13a1	3	-0.85	0.8	1.34	-0.7	-0.6
ENSMUSG00000000318	Clec10a	3	-0.83	0.75	1.38	-0.59	-0.7
ENSMUSG00000012428	Steap4	3	-0.63	0.95	1.2	-0.98	-0.54
ENSMUSG00000064294	Aox3	3	-0.88	1.11	1.06	-0.74	-0.56
ENSMUSG00000030589	Rasgrp4	3	-0.8	1.12	1.06	-0.65	-0.73
ENSMUSG00000030865	Chp2	3	-0.9	1.32	0.81	-0.74	-0.49
ENSMUSG00000022894	Adamts5	3	-0.93	1.16	0.97	-0.86	-0.35
ENSMUSG00000020089	Ppa1	3	-1	1.19	0.92	-0.8	-0.31
ENSMUSG00000026159	Agfg1	3	-1.19	1.17	0.75	-0.8	0.07
ENSMUSG00000037379	Spon2	3	-1.29	1.18	0.74	-0.62	0
ENSMUSG00000063245	Zfp993	3	-1.35	0.74	1	-0.72	0.33
ENSMUSG00000022094	Slc39a14	3	-1.42	0.94	0.72	-0.64	0.4
ENSMUSG00000025959	Klf7	3	-1.1	1.36	0.68	-0.64	-0.29
ENSMUSG00000005686	Ampd3	3	-1.23	1.26	0.76	-0.47	-0.32
ENSMUSG00000019850	Tnfaip3	3	-1.17	1.32	0.71	-0.48	-0.38
ENSMUSG00000040322	Slc25a24	3	-1.09	1.42	0.6	-0.46	-0.47
ENSMUSG00000049878	Rlf	3	-1.28	1.25	0.73	-0.26	-0.44
ENSMUSG00000039456	Morc3	3	-1.38	1.24	0.66	-0.28	-0.22
ENSMUSG00000050777	Tmem37	3	0.02	0.06	1.44	-0.14	-1.38
ENSMUSG00000031555	Adam9	3	-0.49	0.32	1.56	-0.32	-1.06
ENSMUSG00000055148	Klf2	3	-0.61	0.33	1.45	0.02	-1.19
ENSMUSG00000004846	Plod3	3	-0.89	0.32	1.49	0.01	-0.94
ENSMUSG00000032372	Plscr2	3	-0.35	0.44	1.35	-0.07	-1.36
ENSMUSG00000017969	Ptgis	3	-0.32	0.6	1.3	-0.23	-1.34
ENSMUSG00000020432	Tcn2	3	-0.62	0.68	1.29	-0.14	-1.21
ENSMUSG00000059639	Clec4a4	3	-0.72	0.56	1.23	0.21	-1.27
ENSMUSG00000025809	Itgb1	3	-0.57	0.43	1.29	0.18	-1.34
ENSMUSG00000020346	Mgat1	3	-0.66	0.29	1.31	0.34	-1.28
ENSMUSG00000034707	Gns	3	-1.07	0.02	1.43	0.42	-0.8
ENSMUSG00000075254	Heg1	3	-1.01	-0.07	1.56	0.22	-0.7
ENSMUSG00000021130	Galnt16	3	-0.9	-0.03	1.54	0.25	-0.86
ENSMUSG00000003746	Man1a	3	-1.25	0.08	1.5	0.1	-0.43
ENSMUSG00000024085	Man2a1	3	-1.11	0.02	1.55	0.12	-0.59
ENSMUSG00000030102	Itpr1	3	-0.68	-0.29	1.41	0.61	-1.05
ENSMUSG00000016458	Wt1	3	-0.79	-0.32	1.34	0.74	-0.97
ENSMUSG00000031871	Cdh5	3	-0.65	-0.02	1.25	0.67	-1.25
ENSMUSG00000059040	Eno1b	3	-0.83	-0.07	1.31	0.66	-1.08
ENSMUSG00000022912	Pros1	3	-0.79	0.14	1.49	0.2	-1.04
ENSMUSG00000043300	B3galnt1	3	-0.84	0.04	1.43	0.41	-1.04
ENSMUSG00000019055	Plod1	3	-0.81	0.18	1.36	0.41	-1.13
ENSMUSG00000026335	Pam	3	-0.52	-0.12	1.5	0.31	-1.17
ENSMUSG00000019916	P4ha1	3	-0.56	-0.11	1.64	0.03	-1
ENSMUSG00000030101	Sumf1	3	-0.66	-0.1	1.65	0.03	-0.91
ENSMUSG00000057093	Zfp607b	4	-0.89	-0.8	-0.1	0.21	1.58
ENSMUSG00000004099	Dnmt1	4	-0.78	-0.81	-0.2	0.16	1.63
ENSMUSG00000028885	Smpdl3b	4	-0.7	-0.85	-0.21	0.11	1.65
ENSMUSG00000004633	Chn2	4	-0.85	-0.64	-0.16	-0.03	1.69
ENSMUSG00000054083	Capn12	4	-0.88	-0.53	-0.24	-0.05	1.7
ENSMUSG00000037434	Slc30a1	4	-0.84	-0.55	-0.17	-0.15	1.71
ENSMUSG00000028972	Car6	4	-0.81	-0.71	-0.07	-0.1	1.68
ENSMUSG00000039231	Suv39h1	4	-0.86	-0.71	-0.03	-0.07	1.66
ENSMUSG00000021108	Prkch	4	-1	-0.67	-0.08	0.17	1.59
ENSMUSG00000050944	Efcab5	4	-1.07	-0.59	-0.09	0.18	1.57
ENSMUSG00000071454	Dtnb	4	-0.97	-0.56	-0.19	0.06	1.65
ENSMUSG00000025993	Slc40a1	4	-1.05	-0.58	-0.23	0.31	1.55
ENSMUSG00000030607	Acan	4	-1.03	-0.73	-0.12	0.38	1.5
ENSMUSG00000020183	Cpm	4	-1.2	-0.59	0.07	0.24	1.47
ENSMUSG00000030528	Blm	4	-1.03	-0.72	0.18	0.02	1.55
ENSMUSG00000040749	Siah1b	4	-0.7	-0.66	0.01	-0.37	1.72
ENSMUSG00000027015	Cybrd1	4	-0.58	-0.71	0.03	-0.46	1.72
ENSMUSG00000034714	Ttyh2	4	-0.74	-0.67	-0.1	-0.21	1.72
ENSMUSG00000021720	Rnf180	4	-0.78	-0.63	-0.01	-0.28	1.71
ENSMUSG00000019773	Fbxo5	4	-0.63	-0.72	-0.11	-0.28	1.73
ENSMUSG00000033669	Zfp7	4	-0.76	-0.53	-0.18	-0.27	1.74
ENSMUSG00000034317	Trim59	4	-0.88	-0.49	-0.02	-0.31	1.7
ENSMUSG00000030929	Eri2	4	-0.9	-0.37	-0.33	-0.11	1.71
ENSMUSG00000024261	Syt4	4	-0.89	-0.27	-0.25	-0.31	1.72
ENSMUSG00000073197	5730507C01Rik	4	-0.88	-0.29	-0.3	-0.26	1.73
ENSMUSG00000028751	Pla2g2e	4	-0.9	-0.38	-0.22	-0.23	1.72
ENSMUSG00000022722	Arl6	4	-1.01	-0.29	-0.08	-0.3	1.68
ENSMUSG00000030935	Acsm3	4	-0.86	-0.33	-0.2	-0.34	1.73
ENSMUSG00000033596	Rfwd3	4	-0.89	-0.33	-0.12	-0.37	1.71
ENSMUSG00000021991	Cacna2d3	4	-0.76	-0.34	-0.07	-0.57	1.73
ENSMUSG00000026430	Rassf5	4	-1.38	0.55	-0.43	-0.01	1.27
ENSMUSG00000079563	Pglyrp2	4	-1.42	0.35	-0.11	-0.18	1.35
ENSMUSG00000020362	Cnot6	4	-1.54	0.07	0.08	0.12	1.27
ENSMUSG00000019823	Mical1	4	-1.44	0.11	-0.04	-0.01	1.39
ENSMUSG00000059995	Atxn7l3	4	-1.46	0.22	-0.22	0.14	1.33
ENSMUSG00000025373	Rnf41	4	-1.27	-0.18	-0.08	-0.01	1.54
ENSMUSG00000031609	Sap30	4	-1.34	-0.04	-0.07	-0.04	1.49
ENSMUSG00000016526	Dyrk3	4	-1.2	-0.14	-0.23	-0.01	1.58
ENSMUSG00000091144	Phf11c	4	-1.32	0.1	-0.29	0.05	1.47
ENSMUSG00000046490	Rnf222	4	-1.29	-0.05	-0.25	0.08	1.51
ENSMUSG00000038500	Prr3	4	-1.24	-0.07	-0.36	0.15	1.52
ENSMUSG00000020021	Fgd6	4	-1.02	-0.36	-0.18	-0.11	1.67
ENSMUSG00000024270	Slc39a6	4	-1.12	-0.34	-0.13	-0.02	1.62
ENSMUSG00000025332	Kdm5c	4	-1	-0.19	-0.42	-0.06	1.67
ENSMUSG00000029290	Zfp326	4	-1.05	-0.25	-0.31	-0.04	1.65
ENSMUSG00000031732	Phlpp2	4	-1.11	0.02	-0.42	-0.1	1.61
ENSMUSG00000026171	Rnf25	4	-0.8	-0.16	-0.86	0.22	1.6
ENSMUSG00000031862	Atp13a1	4	-0.69	-0.08	-0.9	0.03	1.64
ENSMUSG00000029291	Rufy3	4	-1.19	-0.21	-0.48	0.4	1.47
ENSMUSG00000034575	Papd7	4	-1	-0.31	-0.54	0.26	1.59
ENSMUSG00000033730	Egr3	4	-1.05	-0.19	-0.57	0.23	1.58
ENSMUSG00000043029	Trpv3	4	-0.9	-0.41	-0.52	0.18	1.65
ENSMUSG00000017386	Traf4	4	-0.98	-0.44	-0.36	0.15	1.64
ENSMUSG00000036718	Micall2	4	-0.88	-0.25	-0.65	0.12	1.65
ENSMUSG00000047749	Zc3hav1l	4	-0.92	-0.16	-0.63	0.06	1.65
ENSMUSG00000030376	Slc8a2	4	-0.86	-0.29	-0.52	-0.02	1.7
ENSMUSG00000040054	Baz2a	4	-0.79	-0.4	-0.56	0.05	1.7
ENSMUSG00000022335	Zfat	4	-0.8	0.23	-0.35	-0.72	1.63
ENSMUSG00000071661	Zbtb3	4	-0.75	-0.01	-0.33	-0.63	1.71
ENSMUSG00000051413	Plagl2	4	-0.76	0.07	-0.37	-0.64	1.69
ENSMUSG00000078903	Gm14391	4	-1.03	0.29	-0.25	-0.57	1.57
ENSMUSG00000025105	Bnc1	4	-0.96	0.31	-0.37	-0.57	1.59
ENSMUSG00000034248	Slc25a37	4	-1.09	-0.09	-0.03	-0.41	1.62
ENSMUSG00000029326	Enoph1	4	-0.93	0.01	-0.25	-0.51	1.68
ENSMUSG00000034226	Rhov	4	-0.97	0.06	-0.18	-0.55	1.65
ENSMUSG00000057406	Nsd2	4	-0.98	-0.56	0.32	-0.36	1.58
ENSMUSG00000101337	Dnah7c	4	-1.07	-0.25	0.18	-0.46	1.6
ENSMUSG00000036875	Dna2	4	-1.11	-0.28	0.24	-0.41	1.57
ENSMUSG00000035310	Lin54	4	-1.21	-0.34	0.43	-0.35	1.46
ENSMUSG00000039831	Arhgap29	4	-1.17	0.12	0.1	-0.56	1.51
ENSMUSG00000028410	Dnaja1	4	-1.08	0.1	0.21	-0.72	1.5
ENSMUSG00000028902	Sf3a3	4	-1.34	0.12	0.15	-0.36	1.43
ENSMUSG00000029625	Cpsf4	4	-1.31	0.07	0.08	-0.32	1.48
ENSMUSG00000032026	Rexo2	4	-1.26	-0.03	0.2	-0.4	1.49
ENSMUSG00000022394	L3mbtl2	4	-0.54	0.37	-0.4	-0.99	1.56
ENSMUSG00000078896	Zfp965	4	-0.3	0.46	-0.73	-0.94	1.51
ENSMUSG00000095199	Zfp967	4	-0.47	0.3	-0.88	-0.57	1.61
ENSMUSG00000078898	Zfp968	4	-0.55	0.57	-0.8	-0.71	1.49
ENSMUSG00000074206	Adh6b	4	-0.5	0.43	-0.78	-0.72	1.56
ENSMUSG00000035299	Mid1	4	-0.8	0.48	-0.75	-0.46	1.53
ENSMUSG00000006724	Cyp27b1	4	-0.67	0.36	-0.7	-0.6	1.61
ENSMUSG00000061613	U2af1	4	-0.86	0.7	-0.72	-0.51	1.41
ENSMUSG00000075600	Zc3h3	4	-0.73	0.24	-1.02	-0.03	1.54
ENSMUSG00000026247	Ecel1	4	-0.6	0.25	-0.98	-0.27	1.6
ENSMUSG00000002825	Qtrt1	4	-0.86	0.35	-0.81	-0.25	1.56
ENSMUSG00000049728	Zfp668	4	-0.75	0.28	-0.88	-0.23	1.59
ENSMUSG00000022416	Cacna1i	4	-0.55	0.06	-0.83	-0.37	1.69
ENSMUSG00000001054	Rmnd5b	4	-0.64	0.06	-0.82	-0.27	1.68
ENSMUSG00000038705	Gmeb2	4	-0.8	0.15	-0.71	-0.28	1.66
ENSMUSG00000030067	Foxp1	4	-0.92	0.15	-0.55	-0.33	1.65
ENSMUSG00000073460	Pnldc1	4	-0.91	-0.09	-0.54	-0.15	1.69
ENSMUSG00000046962	Zbtb21	4	-0.82	0.02	-0.76	-0.1	1.66
ENSMUSG00000062542	Syt9	4	-0.5	-0.16	-0.57	-0.53	1.76
ENSMUSG00000001021	S100a3	4	-0.55	-0.19	-0.51	-0.52	1.77
ENSMUSG00000027403	Tgm6	4	-0.44	-0.29	-0.5	-0.56	1.78
ENSMUSG00000053007	Creb5	4	-0.53	-0.2	-0.6	-0.43	1.77
ENSMUSG00000020723	Cacng4	4	-0.44	-0.28	-0.6	-0.45	1.78
ENSMUSG00000038679	Trps1	4	-0.38	-0.18	-0.64	-0.56	1.76
ENSMUSG00000025880	Smad7	4	-0.6	-0.21	-0.39	-0.57	1.77
ENSMUSG00000001065	Zfp276	4	-0.67	-0.2	-0.51	-0.39	1.76
ENSMUSG00000002633	Shh	4	-0.68	-0.2	-0.57	-0.3	1.75
ENSMUSG00000020891	Alox8	4	-0.63	-0.04	-0.56	-0.51	1.74
ENSMUSG00000095930	Nim1k	4	-0.75	-0.05	-0.54	-0.39	1.73
ENSMUSG00000020525	Ppm1d	4	-0.77	-0.05	-0.57	-0.34	1.72
ENSMUSG00000025986	Slc39a10	4	-0.54	-0.44	-0.37	-0.43	1.79
ENSMUSG00000017897	Eya2	4	-0.54	-0.49	-0.43	-0.32	1.78
ENSMUSG00000061048	Cdh3	4	-0.44	-0.38	-0.66	-0.3	1.77
ENSMUSG00000024064	Galnt14	4	-0.38	-0.42	-0.62	-0.35	1.78
ENSMUSG00000013629	Cad	4	-0.55	-0.38	-0.61	-0.22	1.77
ENSMUSG00000064264	Zfp428	4	-0.57	-0.39	-0.59	-0.21	1.77
ENSMUSG00000052415	Tchh	4	-0.58	-0.38	-0.59	-0.21	1.77
ENSMUSG00000035183	Slc24a5	4	-0.62	-0.36	-0.64	-0.12	1.75
ENSMUSG00000051499	Zfp786	4	-0.59	-0.25	-0.62	-0.3	1.76
ENSMUSG00000096916	Zfp850	4	-0.62	-0.26	-0.68	-0.19	1.75
ENSMUSG00000060284	Sp7	4	-0.6	-0.22	-0.7	-0.22	1.75
ENSMUSG00000025328	Padi3	4	-0.76	-0.31	-0.44	-0.23	1.75
ENSMUSG00000017485	Top2b	4	-0.69	-0.45	-0.48	-0.14	1.75
ENSMUSG00000005899	Smpd4	4	-0.26	-0.47	-0.79	-0.22	1.74
ENSMUSG00000044164	Rnf182	4	-0.24	-0.47	-0.81	-0.22	1.74
ENSMUSG00000094622	Gm3055	4	-0.24	-0.51	-0.76	-0.24	1.75
ENSMUSG00000038599	Capn8	4	-0.18	-0.46	-0.77	-0.34	1.75
ENSMUSG00000026135	Zfp142	4	-0.17	-0.43	-0.85	-0.27	1.73
ENSMUSG00000032119	Hinfp	4	-0.3	-0.28	-0.76	-0.42	1.75
ENSMUSG00000042251	Pm20d1	4	-0.17	-0.36	-0.74	-0.47	1.75
ENSMUSG00000037738	Nek5	4	-0.31	-0.11	-0.86	-0.44	1.72
ENSMUSG00000074682	Zcchc3	4	-0.08	-0.24	-1.01	-0.35	1.67
ENSMUSG00000059602	Syn3	4	0.03	-0.26	-1.02	-0.41	1.65
ENSMUSG00000029130	Rnf32	4	-0.1	-0.35	-0.97	-0.28	1.69
ENSMUSG00000032850	Rnft2	4	-0.1	-0.38	-0.89	-0.35	1.71
ENSMUSG00000021567	Nkd2	4	-0.08	-0.46	-0.97	-0.15	1.67
ENSMUSG00000041961	Znrf3	4	0.2	-0.37	-1.21	-0.15	1.53
ENSMUSG00000000247	Lhx2	4	0.21	-0.43	-1.16	-0.17	1.55
ENSMUSG00000022096	Hr	4	0.21	-0.29	-1.26	-0.17	1.5
ENSMUSG00000028977	Casz1	4	-0.01	-0.32	-1.22	-0.01	1.55
ENSMUSG00000031949	Adat1	4	0.2	-0.36	-1.08	-0.35	1.6
ENSMUSG00000029165	Agbl5	4	0.2	-0.39	-1.13	-0.25	1.57
ENSMUSG00000050954	Zfp169	4	0.22	-0.25	-1.08	-0.47	1.58
ENSMUSG00000040721	Zfhx2	4	0.28	-0.43	-1	-0.44	1.59
ENSMUSG00000028266	Lmo4	4	0.18	-0.14	-0.85	-0.8	1.61
ENSMUSG00000040434	Large2	4	0.07	0.19	-1.24	-0.49	1.48
ENSMUSG00000051586	Mical3	4	0.31	-0.66	-0.77	-0.5	1.62
ENSMUSG00000031112	Stk26	4	0.27	-0.69	-0.69	-0.53	1.64
ENSMUSG00000035357	Pdzrn3	4	0.44	-0.72	-0.76	-0.52	1.56
ENSMUSG00000020453	Patz1	4	0.18	-0.57	-0.72	-0.57	1.67
ENSMUSG00000093910	Zfp853	4	0.06	-0.55	-0.62	-0.6	1.72
ENSMUSG00000049739	Zfp646	4	0.14	-0.6	-0.91	-0.28	1.65
ENSMUSG00000026923	Notch1	4	0.24	-0.62	-0.86	-0.39	1.63
ENSMUSG00000024743	Syt7	4	0.04	-0.57	-0.88	-0.27	1.68
ENSMUSG00000031428	Zcchc18	4	-0.02	-0.61	-0.83	-0.24	1.7
ENSMUSG00000000861	Bcl11a	4	-0.04	-0.74	-0.84	-0.04	1.66
ENSMUSG00000053693	Mast1	4	-0.06	-0.67	-0.86	-0.08	1.67
ENSMUSG00000025407	Gli1	4	-0.14	-0.6	-0.9	-0.04	1.68
ENSMUSG00000098488	Pla2g4b	4	0.03	-0.9	-0.84	0.15	1.57
ENSMUSG00000070047	Fat1	4	0.06	-0.84	-0.87	0.06	1.59
ENSMUSG00000020534	Shmt1	4	0.32	-1.04	-0.67	-0.15	1.53
ENSMUSG00000023908	Pkmyt1	4	0.18	-1.07	-0.67	0.01	1.55
ENSMUSG00000045598	Zfp553	4	0.11	-0.81	-0.72	-0.24	1.66
ENSMUSG00000079215	Zfp664	4	0.12	-0.79	-0.72	-0.29	1.67
ENSMUSG00000037855	Zfp365	4	0.18	-0.85	-0.62	-0.36	1.65
ENSMUSG00000032883	Acsl3	4	0.19	-0.92	-0.6	-0.3	1.63
ENSMUSG00000055240	Zfp101	4	-0.12	-1	-0.53	0	1.64
ENSMUSG00000014039	Prdm15	4	-0.09	-0.96	-0.66	0.08	1.62
ENSMUSG00000025529	Zfp711	4	0.02	-1.11	-0.43	-0.09	1.61
ENSMUSG00000028487	Bnc2	4	-0.21	-1.04	-0.3	-0.12	1.67
ENSMUSG00000053897	Slc39a8	4	-0.11	-1.1	-0.31	-0.12	1.64
ENSMUSG00000031936	Hephl1	4	-0.23	-1.24	-0.1	0.01	1.55
ENSMUSG00000035842	Ddx11	4	-0.39	-1.17	-0.18	0.19	1.55
ENSMUSG00000034687	Fras1	4	-0.33	-1.13	-0.28	0.16	1.58
ENSMUSG00000017405	Nek8	4	-0.3	-1.07	-0.37	0.12	1.62
ENSMUSG00000064061	Dzip3	4	-0.09	-1.38	-0.13	0.18	1.43
ENSMUSG00000007080	Pole	4	0.09	-1.38	-0.17	0.04	1.43
ENSMUSG00000027276	Jag1	4	-0.38	-0.72	-0.63	0.01	1.72
ENSMUSG00000021327	Zkscan3	4	-0.27	-0.88	-0.58	0.05	1.68
ENSMUSG00000038611	Phrf1	4	-0.53	-0.65	-0.56	0	1.73
ENSMUSG00000057880	Abat	4	-0.47	-0.74	-0.53	0.02	1.72
ENSMUSG00000025497	Cdhr5	4	-0.54	-0.72	-0.44	-0.02	1.73
ENSMUSG00000005566	Trim28	4	-0.69	-0.52	-0.56	0.05	1.71
ENSMUSG00000041771	Slc24a4	4	-0.58	-0.53	-0.63	0.01	1.73
ENSMUSG00000039238	Zfp750	4	-0.64	-0.73	-0.49	0.19	1.67
ENSMUSG00000028358	Zfp618	4	-0.83	-0.63	-0.4	0.21	1.65
ENSMUSG00000039834	Zfp335	4	-0.27	-0.69	-0.65	-0.13	1.74
ENSMUSG00000037643	Prkci	4	-0.33	-0.64	-0.6	-0.2	1.76
ENSMUSG00000038677	Scube3	4	-0.38	-0.54	-0.65	-0.2	1.76
ENSMUSG00000039385	Cdh6	4	-0.44	-0.59	-0.5	-0.26	1.78
ENSMUSG00000063767	S100a7a	4	-0.4	-0.7	-0.4	-0.26	1.77
ENSMUSG00000004651	Tyr	4	-0.5	-0.65	-0.4	-0.22	1.77
ENSMUSG00000024727	Trpm6	4	-0.48	-0.67	-0.44	-0.17	1.76
ENSMUSG00000037315	Jade3	4	-0.18	-0.76	-0.47	-0.34	1.75
ENSMUSG00000021193	Pitrm1	4	-0.26	-0.54	-0.49	-0.49	1.78
ENSMUSG00000060862	Zbtb40	4	-0.22	-0.64	-0.48	-0.43	1.77
ENSMUSG00000006720	Zfp184	4	-0.32	-0.6	-0.54	-0.32	1.77
ENSMUSG00000037999	Arap2	4	-0.28	-0.57	-0.55	-0.37	1.78
ENSMUSG00000025358	Cdk2	4	-0.57	-0.78	-0.25	-0.13	1.73
ENSMUSG00000018401	Mtmr4	4	-0.56	-0.78	-0.31	-0.08	1.73
ENSMUSG00000005672	Kit	4	-0.52	-0.92	-0.23	-0.02	1.68
ENSMUSG00000005994	Tyrp1	4	-0.36	-0.86	-0.27	-0.25	1.73
ENSMUSG00000022129	Dct	4	-0.3	-0.81	-0.36	-0.27	1.75
ENSMUSG00000073295	Nudt11	4	-0.29	-0.78	-0.49	-0.19	1.74
ENSMUSG00000042197	Zfp451	4	-0.35	-0.81	-0.47	-0.1	1.73
ENSMUSG00000042496	Prdm10	4	-0.3	-0.89	-0.44	-0.08	1.71
ENSMUSG00000036622	Atp13a2	4	-0.61	-0.26	0.51	-1.09	1.45
ENSMUSG00000026646	Suv39h2	4	-0.44	-0.36	0.04	-0.92	1.68
ENSMUSG00000048012	Zfp473	4	-0.68	-0.37	0.25	-0.83	1.63
ENSMUSG00000036867	Smad6	4	-0.14	-0.18	-0.49	-0.9	1.7
ENSMUSG00000036422	Pcdh8	4	-0.19	-0.27	-0.31	-0.94	1.71
ENSMUSG00000034333	Zbed4	4	-0.47	-0.04	-0.38	-0.83	1.72
ENSMUSG00000029474	Rnf34	4	-0.59	0.04	-0.16	-0.94	1.65
ENSMUSG00000040536	Necab1	4	-0.04	-1.11	0.26	-0.63	1.52
ENSMUSG00000033762	Recql4	4	-0.02	-1.03	-0.25	-0.35	1.66
ENSMUSG00000031698	Mylk3	4	-0.04	-1.08	-0.03	-0.46	1.62
ENSMUSG00000033768	Nrxn2	4	0.17	-0.85	-0.37	-0.61	1.66
ENSMUSG00000069805	Fbp1	4	-0.34	-0.27	-0.43	-0.73	1.76
ENSMUSG00000001804	Dsg4	4	-0.23	-0.43	-0.48	-0.64	1.77
ENSMUSG00000025626	Phf6	4	-0.41	-0.48	-0.35	-0.55	1.78
ENSMUSG00000064325	Hhip	4	-0.25	-0.58	-0.4	-0.54	1.77
ENSMUSG00000039682	Lap3	4	-0.31	-0.5	-0.4	-0.58	1.78
ENSMUSG00000029151	Slc30a3	4	-0.4	-0.72	-0.22	-0.42	1.76
ENSMUSG00000025742	Prps2	4	-0.19	-0.72	-0.31	-0.53	1.75
ENSMUSG00000073293	Nudt10	4	-0.34	-0.64	-0.24	-0.55	1.77
ENSMUSG00000116673	A630089N07Rik	4	-0.32	-0.65	-0.22	-0.57	1.76
ENSMUSG00000037326	Capn15	4	-0.91	-0.2	-0.88	0.55	1.43
ENSMUSG00000005883	Spo11	4	-0.72	-0.39	-0.97	0.7	1.38
ENSMUSG00000028392	Bspry	4	-0.8	-0.61	-0.6	0.46	1.55
ENSMUSG00000021587	Pcsk1	4	-0.75	-0.75	-0.52	0.48	1.54
ENSMUSG00000074480	Mex3a	4	-0.89	-0.76	-0.35	0.51	1.49
ENSMUSG00000075040	Zfp408	4	-0.9	-0.72	-0.52	0.82	1.32
ENSMUSG00000037605	Adgrl3	4	-0.78	-0.65	-0.7	0.72	1.4
ENSMUSG00000022199	Slc22a17	4	-0.59	-0.83	-0.75	0.99	1.19
ENSMUSG00000034059	Ypel4	4	-0.51	-0.82	-0.84	1.04	1.13
ENSMUSG00000059049	Frem1	4	-0.58	-0.81	-0.75	0.76	1.37
ENSMUSG00000061898	Rbak	4	-0.47	-0.78	-0.88	0.82	1.31
ENSMUSG00000031562	Dctd	4	-0.44	-0.99	-0.43	0.27	1.6
ENSMUSG00000054808	Actn4	4	-0.51	-0.9	-0.45	0.23	1.63
ENSMUSG00000025265	Fgd1	4	-0.41	-0.92	-0.48	0.16	1.65
ENSMUSG00000021318	Gli3	4	-0.6	-0.89	-0.44	0.35	1.59
ENSMUSG00000047342	Zfp286	4	-0.57	-0.88	-0.52	0.4	1.57
ENSMUSG00000040703	Cyp2s1	4	-0.55	-0.99	-0.39	0.37	1.56
ENSMUSG00000047496	Rnf152	4	-0.52	-1.09	-0.24	0.3	1.55
ENSMUSG00000023050	Map3k12	4	-0.66	-0.96	-0.26	0.31	1.57
ENSMUSG00000037784	Dzip1l	4	-0.7	-0.9	-0.39	0.48	1.52
ENSMUSG00000025329	Padi1	4	-0.71	-0.94	-0.34	0.5	1.5
ENSMUSG00000049532	Sall2	4	-0.67	-0.9	-0.48	0.55	1.49
ENSMUSG00000027386	Fbln7	4	-0.74	-1.04	-0.19	0.57	1.41
ENSMUSG00000016933	Plcg1	4	-0.55	-1.1	-0.44	0.79	1.3
ENSMUSG00000033276	Stk36	4	-0.49	-1.01	-0.49	0.5	1.5
ENSMUSG00000030380	Mzf1	4	-0.41	-1.08	-0.46	0.46	1.49
ENSMUSG00000066842	Hmcn1	4	-0.45	-1.1	-0.42	0.5	1.47
ENSMUSG00000034748	Sirt6	4	-0.31	-0.62	-1	0.39	1.54
ENSMUSG00000068740	Celsr2	4	-0.32	-0.62	-0.98	0.37	1.55
ENSMUSG00000037243	Zfp692	4	-0.21	-0.77	-0.96	0.43	1.5
ENSMUSG00000031661	Nkd1	4	-0.32	-0.48	-1.11	0.41	1.5
ENSMUSG00000042439	Zfp532	4	-0.23	-0.61	-1.1	0.46	1.47
ENSMUSG00000031757	Mt4	4	-0.02	-0.59	-1.24	0.49	1.37
ENSMUSG00000034112	Atp2c2	4	-0.16	-1.03	-0.79	0.57	1.4
ENSMUSG00000038244	Mical2	4	0.11	-1.12	-0.74	0.32	1.44
ENSMUSG00000036158	Prickle1	4	-0.47	-0.78	-0.7	0.35	1.6
ENSMUSG00000030811	Fbxl19	4	-0.54	-0.67	-0.73	0.31	1.62
ENSMUSG00000015467	Egfl8	4	-0.2	-0.9	-0.76	0.29	1.58
ENSMUSG00000059674	Cdh24	4	-0.26	-0.84	-0.78	0.28	1.59
ENSMUSG00000060510	Zfp266	4	-0.32	-0.9	-0.74	0.42	1.54
ENSMUSG00000004815	Dgkq	4	-0.36	-0.72	-0.81	0.26	1.62
ENSMUSG00000048402	Gli2	4	-0.28	-0.8	-0.76	0.21	1.63
ENSMUSG00000031351	Zfp185	4	-0.32	-0.8	-0.69	0.15	1.66
ENSMUSG00000040502	Marchf9	4	-0.36	-0.19	-1.27	0.37	1.45
ENSMUSG00000018727	Cpsf4l	4	-0.3	-0.1	-1.15	-0.05	1.6
ENSMUSG00000055333	Fat2	4	-0.27	-0.07	-1.16	-0.11	1.6
ENSMUSG00000016763	Scube1	4	-0.2	-0.42	-1	-0.04	1.67
ENSMUSG00000028370	Pappa	4	-0.3	-0.39	-0.97	-0.03	1.68
ENSMUSG00000078651	Aoc2	4	-0.39	-0.41	-0.99	0.16	1.63
ENSMUSG00000054191	Klf1	4	-0.34	-0.43	-1.04	0.2	1.61
ENSMUSG00000059552	Trp53	4	-0.43	-0.41	-0.86	-0.01	1.71
ENSMUSG00000059474	Mbtd1	4	-0.45	-0.36	-0.8	-0.11	1.73
ENSMUSG00000045409	Trim39	4	-0.41	-0.61	-0.76	0.08	1.7
ENSMUSG00000025050	Pcgf6	4	-0.33	-0.63	-0.81	0.08	1.68
ENSMUSG00000022479	Vdr	4	-0.35	-0.55	-0.77	-0.06	1.73
ENSMUSG00000078657	Crnn	4	-0.64	-0.4	-0.81	0.2	1.65
ENSMUSG00000033237	Arid2	4	-0.43	-0.52	-0.84	0.11	1.68
ENSMUSG00000020937	Plcd3	4	-0.5	-0.43	-0.9	0.17	1.65
ENSMUSG00000072980	Oip5	4	-0.5	-1.12	0.19	-0.13	1.56
ENSMUSG00000017146	Brca1	4	-0.57	-1.12	0.27	-0.12	1.53
ENSMUSG00000039748	Exo1	4	-0.47	-1.22	0.36	-0.14	1.46
ENSMUSG00000029521	Chek2	4	-0.45	-1.29	0.23	0.08	1.44
ENSMUSG00000051235	Gen1	4	-0.61	-0.95	0.46	-0.42	1.53
ENSMUSG00000054999	Naaladl1	4	-0.7	-0.95	0.46	-0.33	1.52
ENSMUSG00000022034	Esco2	4	-0.6	-1.08	0.41	-0.23	1.5
ENSMUSG00000025574	Tk1	4	-0.57	-1.09	0.46	-0.29	1.48
ENSMUSG00000034329	Brip1	4	-0.66	-1.23	0.84	-0.1	1.15
ENSMUSG00000035455	Fignl1	4	-0.75	-1.07	0.68	-0.2	1.34
ENSMUSG00000001228	Uhrf1	4	-0.46	-0.96	0.07	-0.31	1.66
ENSMUSG00000041670	Rims1	4	-0.45	-0.92	0.1	-0.39	1.67
ENSMUSG00000035293	G2e3	4	-0.6	-0.94	0	-0.12	1.66
ENSMUSG00000026196	Bard1	4	-0.53	-0.98	0.07	-0.21	1.65
ENSMUSG00000044365	Cxxc4	4	-0.4	-1.04	-0.03	-0.18	1.65
ENSMUSG00000019189	Rnf145	4	-0.56	-1.19	0.02	0.23	1.49
ENSMUSG00000041119	Pde9a	4	-0.65	-1.18	0.11	0.26	1.46
ENSMUSG00000032368	Zic1	4	-0.63	-1.24	0.16	0.31	1.4
ENSMUSG00000010044	Zmynd10	4	-0.49	-1.26	-0.12	0.48	1.39
ENSMUSG00000040543	Pitpnm3	4	-0.78	-1.17	0.38	0.22	1.35
ENSMUSG00000053399	Adamts18	4	-0.79	-1.11	0.13	0.37	1.4
ENSMUSG00000042179	Pnliprp1	4	-0.8	-1.03	0.17	0.16	1.5
ENSMUSG00000029283	Cdc7	4	-0.81	-1.04	0.16	0.21	1.48
ENSMUSG00000021176	Efcab11	4	-0.61	-1.4	0.4	0.46	1.14
ENSMUSG00000027966	Col11a1	4	-1.05	-1	0.29	0.51	1.24
ENSMUSG00000029516	Cit	4	-1.03	-1.06	0.44	0.47	1.18
ENSMUSG00000067860	Zic3	4	-0.88	-1.14	0.13	0.69	1.19
ENSMUSG00000112160	BC024063	4	-1	-0.97	0.01	0.74	1.23
ENSMUSG00000029603	Dtx1	4	-0.96	-1.02	0.08	0.63	1.28
ENSMUSG00000029570	Lfng	4	-1.21	-0.63	1.32	-0.08	0.61
ENSMUSG00000027070	Lrp2	4	-0.93	-0.93	1.33	-0.17	0.7
ENSMUSG00000022978	Mis18a	4	-0.91	-1.07	1.12	-0.03	0.89
ENSMUSG00000020649	Rrm2	4	-1.29	-0.48	0.57	-0.12	1.33
ENSMUSG00000051323	Pcdh19	4	-1.34	-0.38	0.38	-0.04	1.38
ENSMUSG00000032586	Traip	4	-1.27	-0.55	0.43	0.01	1.38
ENSMUSG00000039055	Eme1	4	-1.24	-0.54	0.42	-0.04	1.41
ENSMUSG00000030254	Rad18	4	-1.31	-0.46	0.79	-0.21	1.19
ENSMUSG00000035683	Melk	4	-1.23	-0.62	0.77	-0.15	1.22
ENSMUSG00000020897	Aurkb	4	-1.15	-0.73	0.49	0.01	1.38
ENSMUSG00000039396	Neil3	4	-1.14	-0.82	0.47	0.15	1.34
ENSMUSG00000025203	Scd2	4	-1.14	-0.75	0.38	0.11	1.41
ENSMUSG00000020914	Top2a	4	-1.04	-0.73	0.53	-0.2	1.44
ENSMUSG00000069793	Slfn9	4	-0.99	-0.78	0.6	-0.24	1.41
ENSMUSG00000017716	Birc5	4	-1.28	-0.77	0.95	0.19	0.91
ENSMUSG00000026575	Nme7	4	-1.4	-0.67	0.66	0.43	0.98
ENSMUSG00000019843	Fyn	4	-1.44	-0.62	0.74	0.42	0.91
ENSMUSG00000026134	Prim2	4	-1.13	-0.89	0.83	0.08	1.11
ENSMUSG00000052974	Cyp2f2	4	-1.1	-0.84	0.78	-0.04	1.2
ENSMUSG00000002297	Dbf4	4	-1.2	-0.8	0.65	0.12	1.22
ENSMUSG00000024065	Ehd3	4	-1.11	-0.95	0.6	0.26	1.2
ENSMUSG00000026622	Nek2	4	-1.09	-0.92	0.68	0.12	1.21
ENSMUSG00000023015	Racgap1	4	-1.08	-0.97	0.71	0.18	1.17
ENSMUSG00000030779	Rbbp6	4	-1.17	-0.63	-0.16	0.62	1.35
ENSMUSG00000037224	Zfyve28	4	-1.23	-0.68	-0.03	0.69	1.25
ENSMUSG00000018474	Chd3	4	-1.13	-0.7	-0.23	0.85	1.21
ENSMUSG00000024922	Ovol1	4	-1.37	-0.35	-0.12	0.54	1.3
ENSMUSG00000074489	Bglap3	4	-1.57	-0.25	0.19	0.59	1.04
ENSMUSG00000046572	Zfp518b	4	-1.42	-0.52	0.17	0.63	1.14
ENSMUSG00000024365	Cyp21a1	4	-1.37	-0.55	0.06	0.72	1.14
ENSMUSG00000024136	Dnase1l2	4	-1.29	-0.82	0.38	0.86	0.88
ENSMUSG00000031374	Zfp92	4	-1.22	-0.81	0.13	0.84	1.06
ENSMUSG00000028629	Exo5	4	-1.42	-0.61	0.4	0.53	1.09
ENSMUSG00000041654	Slc39a11	4	-1.31	-0.78	0.4	0.59	1.09
ENSMUSG00000042207	Kdm5b	4	-1.4	-0.12	-0.41	0.98	0.94
ENSMUSG00000054967	Zfp647	4	-1.19	-0.38	-0.44	0.67	1.34
ENSMUSG00000034762	Glis1	4	-1.18	-0.3	-0.55	0.73	1.3
ENSMUSG00000049685	Cyp2g1	4	-1.2	-0.43	-0.45	0.96	1.12
ENSMUSG00000074220	Zfp382	4	-1.16	-0.22	-0.66	0.81	1.23
ENSMUSG00000027478	Dnmt3b	4	-1.11	-0.1	-0.82	0.85	1.17
ENSMUSG00000038151	Prdm1	4	-1.45	0	-0.38	0.71	1.12
ENSMUSG00000059743	Fdps	4	-1.52	0.05	-0.25	0.59	1.14
ENSMUSG00000026620	Mark1	4	-1.36	-0.08	-0.44	0.64	1.24
ENSMUSG00000079036	Alkbh1	4	-1.36	0.05	-0.53	0.63	1.21
ENSMUSG00000052752	Traf7	4	-1.38	0	-0.36	0.41	1.34
ENSMUSG00000015143	Actn1	4	-1.33	-0.11	-0.39	0.48	1.35
*Differential expression determined where log2 fold change > 0.58 and Benjamini-Hochberg adjusted P value < 0.05. Values = Z scores. Clusters were annotated based presence in one of four sub-clusters. Metal list combined from UniProt KB Keywords: Calcium (KW-0106), Magnesium (KW-0460), Iron (KW-0408), Zinc (KW-0862), Copper (KW-0186), Manganese (KW-0464) and Cobalt (KW-0170).

## Sheet: S9
Table S9. Functional annotation output from hierarchal clustering of wound-upregulated metal-linked genes (Supplementary Figure S4)*
Cluster	Annotation	Genes	Padjust
1	Extracellular Matrix (KW-0272)	31	3.7e-25
1	Cell Adhesion (KW-0130)	32	5.2e-18
1	Metalloprotease (KW-0482)	19	5.6e-15
1	Cadherin (IPR039808)	18	2.3e-13
1	Oxidoreductase (KW-0560)	16	0.0027
1	Differentiation (KW-0221)	15	0.0077
1	Elastic Fiber (GO:0071953)	3	0.0093
2	Dioxygenase Activity (GO:0051213)	12	0.0048
2	Oxidoreductase (KW-0560)	6	0.0014
2	Phosphoprotein (KW-0597)	48	0.011
2	Chromatin Regulator (KW-0156)	7	0.013
3	Immunity (KW-0391)	42	2.8e-14
3	Metalloprotease (KW-0482)	24	3.9e-08
3	Oxidoreductase (KW-0560)	28	0.00097
3	Apoptosis (KW-0053)	24	0.006
3	Extracellular Matrix (GO:0031012)	19	0.0062
3	Cell Adhesion (KW-0130)	21	0.01
3	Blood Coagulation (KW-0094)	5	0.026
4	Transcription Regulation (KW-0805)	76	2.8e-14
4	Phosphoprotein (KW-0597)	171	3.9e-08
4	Cell Cycle (KW-0131)	24	0.00097
4	Chromatin Regulator (KW-0156)	13	0.006
4	Cadherin (IPR039808)	10	0.0062
4	Positive Regulation of Keratinocyte Differentiation (GO:0045618)	5	0.01
4	Oxidoreductase (KW-0560)	20	0.026
*KW = UniProt Knowledge Base Keyword. GO = Gene Ontology. IPR = InterPro. Data from clustering in Supplementary Figure 2.

## Sheet: S10
Table S10. Top 30 upstream regulators determined from metal-specific differentially expressed genes in four identified clusters (Supplementary Figure S4)
Cluster	Upstream Regulator	Predicted Activation	Activation Z Score	P Value
1	TGFB1	Activated	4.873	1.19e-08
1	TP53	Activated	3.828	0.00101
1	Let-7a-5p	Inhibited	-3.717	6.71e-10
1	Mir-30c-5p	Inhibited	-3.583	2.16e-10
1	Alpha catenin	Inhibited	-3.402	5.51e-10
1	AHR	Inhibited	-3.391	1.81e-08
1	miR-29b-3p	Inhibited	-3.365	1.23e-11
1	miR-338-3p	Inhibited	-3.162	3.4e-13
1	miR-335-3p	Inhibited	-3.162	1.86e-14
1	XBP1	Activated	2.954	0.000191
1	VEGF	Activated	2.948	0.00123
1	CCR2	Activated	2.813	6.2e-06
1	Tgf beta (group)	Activated	2.782	0.000993
1	TGFB2	Activated	2.724	7.05e-06
1	RETNLB	Activated	2.646	5.56e-06
1	IL10RA	Activated	2.646	0.0108
1	FFAR	Inhibited	-2.646	6.56e-06
1	CD44	Activated	2.63	0.000461
1	HNF1A	Activated	2.611	0.0233
1	CSF1	Activated	2.599	0.00162
1	TWIST1	Activated	2.566	1.4e-05
1	FGF2	Activated	2.539	0.000295
1	PSMB11	Inhibited	-2.449	0.000666
1	HTT	Activated	2.449	0.00343
1	ITGB1	Inhibited	-2.443	3.34e-07
1	PKC(s)	Activated	2.425	0.00297
1	MYCN	Inhibited	-2.415	0.000188
1	Let-7	Inhibited	-2.407	0.0125
1	SP1	Activated	2.407	0.00385
1	SMAD7	Inhibited	-2.396	6.55e-06
2	TP53	Activated	2.719	0.178
2	E2F1	Activated	2.599	0.0221
2	TGFB1	Activated	2.295	0.00279
2	TNF	Activated	2.294	0.00769
2	miR-291a-3p	Inhibited	-2.224	0.0081
2	LDL	Activated	2.207	0.00455
2	CG	Activated	2.186	0.0159
2	SMARCA4	Activated	2.171	0.0138
2	RELA	Activated	2.151	0.0408
2	EGF	Activated	2.139	0.0217
2	CSF2	Activated	2.078	0.0199
2	IL1B	Activated	2.002	0.00173
2	CREM	Activated	2	0.00356
2	ERG	Activated	2	0.0101
2	10E,12Z-Octadecadienoic acid	Activated	2	0.00399
2	Let-7	Inhibited	-2	0.0126
3	TNF	Activated	6.369	7.78e-21
3	IFNG	Activated	5.966	6.11e-22
3	Tretinoin	Activated	5.795	2.43e-16
3	IL1B	Activated	5.446	2.17e-17
3	IL6	Activated	4.764	4.41e-11
3	Interferon alpha (group)	Activated	4.736	2.69e-15
3	IL1A	Activated	4.537	1.39e-12
3	CSF2	Activated	4.471	1.06e-12
3	EGF	Activated	4.463	6.33e-08
3	ETV6-RUNK1	Inhibited	-4.409	4.47e-12
3	PDGF BB	Activated	4.364	6.61e-11
3	IRF7	Activated	4.359	4.81e-13
3	PRL	Activated	4.319	2.6e-12
3	IRF3	Activated	4.325	1.07e-18
3	IL17A	Activated	4.209	3.99e-12
3	Vegf (group)	Activated	4.12	1.29e-05
3	TGM2	Activated	4.082	3.16e-08
3	Alpha catenin	Inhibited	-4.044	1.38e-12
3	TGFB1	Activated	3.986	7.65e-19
3	OSM	Activated	3.977	1.3e-10
3	SMARCA4	Activated	3.946	0.000289
3	PI3K (complex)	Activated	3.934	0.00769
3	TLR3	Activated	3.918	0.00455
3	APP	Activated	3.869	1.34e-12
3	RELA	Activated	3.847	3.81e-06
3	IL1RN	Inhibited	-3.809	5.07e-10
3	F2	Activated	3.769	1.09e-08
3	IL1	Activated	3.651	7.02e-07
3	HIF1A	Activated	3.593	2.62e-07
3	IKBKB	Activated	3.576	3.45e-08
4	CCND1	Activated	3.687	7.04e-05
4	Vegf (group)	Activated	3.487	0.00592
4	l-asparaginase	Inhibited	-3.162	1.3e-05
4	HGF	Activated	3.161	0.0243
4	Estrogen	Activated	3.081	0.0149
4	SP1	Activated	2.97	0.00808
4	ERBB2	Activated	2.877	0.00203
4	CDKN1B	Inhibited	-2.795	0.000502
4	MITF	Activated	2.74	0.000353
4	TCF7L2	Activated	2.716	0.0141
4	CSF2	Activated	2.652	0.00379
4	SIM1	Activated	2.646	0.0481
4	Erk (group)	Activated	2.618	0.0388
4	EZH2	Inhibited	-2.618	0.000509
4	CD18	Activated	2.608	0.0128
4	RELA	Activated	2.596	0.0149
4	STAT3	Activated	2.592	0.032
4	SPARC	Inhibited	-2.57	0.00162
4	CTNNB1	Activated	2.544	0.000366
4	GU1	Activated	2.485	0.000467
4	ADRB (group)	Inhibited	-2.449	0.0232
4	IL10	Activated	2.449	1
4	WWTR1	Activated	2.433	0.0002
4	MR17HG	Inhibited	-2.425	0.0132
4	miR-34a-5p	Inhibited	-2.416	0.0174
4	YAP1	Inhibited	2.412	0.0301
4	BMP7	Inhibited	2.412	0.0193
4	SOX2	Inhibited	2.398	0.00313
4	TP63	Inhibited	2.299	0.000503
4	HIF1A	Inhibited	-2.28	0.0175

[truncated: 20 more sheets: S11, S12, S13, S14, S15, S16, S17, S18, S19, S20, S21, S22, S23, S24, S25, S26, S27, S28, S29, S30]
